# Supplementary material for: The influence of hla genotype on the development of metal hypersensitivity following joint replacement
Source: Research Square preprint supplement (doi:10.21203/rs.3.rs-918228/v1), 2021-10-29
Supplement: Supplementary file 1 [file 5b283118c712560592484870.xlsx]

## Sheet: Sheet1
Patients who developed moderate or severe ALVAL in response to prostheses with lower wear (n=27) versus patients with macrophage only reaction (n=38)
***START	OF	UNPHASED	3.0.13***
ANALYSIS	OPTIONS
Number	of	nuclear	families:	0
Number	of	unrelated	subjects:	65
Rare	haplotype	maximum	frequency	(-rare):	0
Zero	haplotype	maximum	frequency	(-zero):	1e-08
Quantitative	trait	variance	(-variance):	1
Model	normal	distribution	(-normal):	N
Restrict	to	certain	haplotypes	(-certain):	N
Estimate	missing	genotypes	(-missing):	N
Test	genotypes	(-genotype):	N
Condition	on	genotype	effects	(-condgenotype):	N
Assume	no	prior	linkage	(-nolinkage):	N
Model	odds	ratio	in	parents	(-parentrisk):	N
Use	only	one	family	based	control	(-onefbc):	N
Chromosome	X	(-chrX):	N
Chromosome	Y	(-chrY):	N
Convergence	threshold	(-epsilon):	1e-08
Numerical	maximisation	(-neldermead):	D-F-P
Random	restarts	(-restarts):	0
Random	number	seed	(-randomseed):	1
Number	of	permutations	(-permutation):	0
Permutation	distribution	quantile	(-quantile):	5
OUTPUT	OPTIONS
Output	file	(-output):
Brief	output	(-brief):	N
Output	LD	statistics	(-LD):	N
Output	permutation	analyses	(-permoutput):	N
Haplotype	dump	file	(-dump):
Just	the	most	likely	haplotypes	(-mostlikely):	N
---------
ANALYSIS	OF	BINARY	TRAIT:	Disease
Exploratory	pass...done
Identifying	rare	haplotypes:	Alternative	likelihood...done	(109	evaluations)
Individual	tests:	Null	likelihood...done	(39	evaluations)
Null	likelihood...done	(39	evaluations)
Alternative	likelihood...done	(106	evaluations)
MARKER	OPTIONS
Test	marker:	1
TEST	OF	OVERALL	ASSOCIATION
Null	log-likelihood	=	-252.6
Alternative	log-likelihood	=	-240.1
Likelihood	ratio	chisq	=	24.83	df	=	17	p-value	=	0.09866
ESTIMATES	OF	ALLELE	EFFECTS
Reference	allele:	101
Allele	Case	Control	Ca-Freq	Co-Freq	Odds-R	95%Lo	95%Hi	Chisq	P-value
101	6	16	0.1111	0.2105	1	1	1	2.219	0.1363
201	18	20	0.3333	0.2632	2.4	0.7722	7.459	0.7515	0.386
205	0	1	0	0.01316	0	0	0	0.716	0.3974
301	9	13	0.1667	0.1711	1.846	0.5205	6.548	0.00432	0.9476
305	0	1	0	0.01316	0	0	0	0.716	0.3974
1101	3	2	0.05556	0.02632	4	0.5305	30.16	0.7298	0.3929
2301	0	3	0	0.03947	0	0	0	2.182	0.1396
2402	6	5	0.1111	0.06579	3.2	0.7048	14.53	0.8372	0.3602
2403	1	0	0.01852	0	7729000000000000	2682000000000000	2.228e+16	1.418	0.2337
2501	1	0	0.01852	0	7729000000000000	2682000000000000	2.228e+16	1.418	0.2337
2601	1	0	0.01852	0	7729000000000000	2682000000000000	2.228e+16	1.418	0.2337
2902	3	2	0.05556	0.02632	4	0.5305	30.16	0.7298	0.3929
3002	2	0	0.03704	0	3.646e+16	1.638e+16	8.116e+16	2.859	0.09088
3101	1	1	0.01852	0.01316	2.667	0.1429	49.76	0.05989	0.8067
3201	2	3	0.03704	0.03947	1.778	0.2358	13.41	0.005068	0.9432
3301	0	3	0	0.03947	0	0	0	2.182	0.1396
6801	1	5	0.01852	0.06579	0.5333	0.05121	5.554	1.602	0.2056
6802	0	1	0	0.01316	0	0	0	0.716	0.3974
---------
Exploratory	pass...done
Identifying	rare	haplotypes:	Alternative	likelihood...done	(128	evaluations)
Individual	tests:	Null	likelihood...done	(42	evaluations)
Null	likelihood...done	(42	evaluations)
Alternative	likelihood...done	(128	evaluations)
MARKER	OPTIONS
Test	marker:	2
TEST	OF	OVERALL	ASSOCIATION
Null	log-likelihood	=	-315.9
Alternative	log-likelihood	=	-299.8
Likelihood	ratio	chisq	=	32.29	df	=	25	p-value	=	0.1498
ESTIMATES	OF	ALLELE	EFFECTS
Reference	allele:	702
Allele	Case	Control	Ca-Freq	Co-Freq	Odds-R	95%Lo	95%Hi	Chisq	P-value
702	6	14	0.1111	0.1892	1	1	1	1.444	0.2296
707	1	0	0.01852	0	557200000000	193300000000	1606000000000	1.381	0.2399
801	7	12	0.1296	0.1622	1.361	0.358	5.175	0.2614	0.6092
812	1	0	0.01852	0	557200000000	193300000000	1606000000000	1.381	0.2399
1302	1	3	0.01852	0.04054	0.7778	0.06665	9.076	0.5001	0.4794
1401	2	2	0.03704	0.02703	2.333	0.2635	20.66	0.1033	0.7479
1402	1	3	0.01852	0.04054	0.7778	0.06665	9.076	0.5001	0.4794
1501	5	8	0.09259	0.1081	1.458	0.335	6.348	0.08236	0.7741
1801	3	0	0.05556	0	2158000000000	1079000000000	4316000000000	4.21	0.04019
2705	2	1	0.03704	0.01351	4.667	0.3522	61.84	0.7548	0.385
3501	4	4	0.07407	0.05405	2.333	0.4332	12.57	0.2135	0.644
3502	0	1	0	0.01351	7.582e-08	7.582e-08	7.582e-08	0.7355	0.3911
3503	1	1	0.01852	0.01351	2.333	0.1243	43.79	0.05084	0.8216
3801	1	1	0.01852	0.01351	2.333	0.1243	43.79	0.05084	0.8216
3901	0	2	0	0.02703	0	0	0	1.483	0.2234
4001	2	3	0.03704	0.04054	1.556	0.2045	11.83	0.01021	0.9195
4402	6	8	0.1111	0.1081	1.75	0.4202	7.288	0.00289	0.9571
4403	3	5	0.05556	0.06757	1.4	0.2503	7.83	0.07688	0.7816
4501	2	0	0.03704	0	1743000000000	783100000000	3880000000000	2.784	0.0952
5001	0	1	0	0.01351	7.582e-08	7.582e-08	7.582e-08	0.7355	0.3911
5101	2	1	0.03704	0.01351	4.667	0.3522	61.84	0.7548	0.385
5301	0	1	0	0.01351	7.582e-08	7.582e-08	7.582e-08	0.7355	0.3911
5501	2	0	0.03704	0	1743000000000	783100000000	3880000000000	2.784	0.0952
5701	0	3	0	0.04054	0	0	0	2.242	0.1343
15220	1	0	0.01852	0	557200000000	193300000000	1606000000000	1.381	0.2399
44110	1	0	0.01852	0	557200000000	193300000000	1606000000000	1.381	0.2399
---------
Exploratory	pass...done
Identifying	rare	haplotypes:	Alternative	likelihood...done	(105	evaluations)
Individual	tests:	Null	likelihood...done	(46	evaluations)
Null	likelihood...done	(46	evaluations)
Alternative	likelihood...done	(114	evaluations)
MARKER	OPTIONS
Test	marker:	3
TEST	OF	OVERALL	ASSOCIATION
Null	log-likelihood	=	-265.6
Alternative	log-likelihood	=	-259.7
Likelihood	ratio	chisq	=	11.86	df	=	15	p-value	=	0.6898
ESTIMATES	OF	ALLELE	EFFECTS
Reference	allele:	102
Allele	Case	Control	Ca-Freq	Co-Freq	Odds-R	95%Lo	95%Hi	Chisq	P-value
102	0	2	0	0.02778	1	1	1	1.524	0.217
202	2	2	0.03704	0.02778	340000000	53610000	2156000000	0.08606	0.7692
303	6	4	0.1111	0.05556	510000000	148000000	1757000000	1.303	0.2536
304	2	4	0.03704	0.05556	170000000	33840000	854100000	0.2333	0.6291
401	6	8	0.1111	0.1111	255000000	88230000	737100000	1.121e-13	1
501	6	7	0.1111	0.09722	291400000	98160000	865200000	0.06433	0.7998
602	3	7	0.05556	0.09722	145700000	39230000	541300000	0.7332	0.3919
701	8	12	0.1481	0.1667	226700000	89790000	572300000	0.07925	0.7783
702	9	15	0.1667	0.2083	204000000	85360000	487500000	0.3474	0.5556
704	1	0	0.01852	0	9.786e+22	3.136e+22	3.054e+23	1.344	0.2463
802	3	5	0.05556	0.06944	204000000	51290000	811500000	0.1001	0.7517
1203	3	2	0.05556	0.02778	510000000	93600000	2779000000	0.6248	0.4293
1402	1	0	0.01852	0	9.786e+22	3.136e+22	3.054e+23	1.344	0.2463
1502	1	0	0.01852	0	9.786e+22	3.136e+22	3.054e+23	1.344	0.2463
1601	3	3	0.05556	0.04167	340000000	73730000	1568000000	0.1312	0.7171
1602	0	1	0	0.01389	0	0	0	0.756	0.3846
---------
Exploratory	pass...done
Identifying	rare	haplotypes:	Alternative	likelihood...done	(39	evaluations)
Individual	tests:	Null	likelihood...done	(28	evaluations)
Null	likelihood...done	(28	evaluations)
Alternative	likelihood...done	(39	evaluations)
MARKER	OPTIONS
Test	marker:	4
TEST	OF	OVERALL	ASSOCIATION
Null	log-likelihood	=	-74.23
Alternative	log-likelihood	=	-73.26
Likelihood	ratio	chisq	=	1.94	df	=	3	p-value	=	0.5851
ESTIMATES	OF	ALLELE	EFFECTS
Reference	allele:	103
Allele	Case	Control	Ca-Freq	Co-Freq	Odds-R	95%Lo	95%Hi	Chisq	P-value
103	39	60	0.7222	0.8108	1	1	1	1.398	0.237
201	10	11	0.1852	0.1486	1.399	0.5428	3.604	0.3039	0.5815
202	3	2	0.05556	0.02703	2.308	0.3687	14.44	0.6769	0.4107
206	2	1	0.03704	0.01351	3.077	0.2698	35.09	0.7548	0.385
---------
Exploratory	pass...done
Identifying	rare	haplotypes:	Alternative	likelihood...done	(111	evaluations)
Individual	tests:	Null	likelihood...done	(34	evaluations)
Null	likelihood...done	(34	evaluations)
Alternative	likelihood...done	(103	evaluations)
MARKER	OPTIONS
Test	marker:	5
TEST	OF	OVERALL	ASSOCIATION
Null	log-likelihood	=	-229.6
Alternative	log-likelihood	=	-221.5
Likelihood	ratio	chisq	=	16.12	df	=	16	p-value	=	0.4449
ESTIMATES	OF	ALLELE	EFFECTS
Reference	allele:	101
Allele	Case	Control	Ca-Freq	Co-Freq	Odds-R	95%Lo	95%Hi	Chisq	P-value
101	5	3	0.09259	0.04054	1	1	1	1.444	0.2296
201	4	9	0.07407	0.1216	0.2667	0.04178	1.702	0.7735	0.3791
301	2	5	0.03704	0.06757	0.24	0.02722	2.116	0.5629	0.4531
401	21	35	0.3889	0.473	0.36	0.07794	1.663	0.8969	0.3436
402	6	7	0.1111	0.09459	0.5143	0.08506	3.109	0.09334	0.76
501	3	2	0.05556	0.02703	0.9	0.09102	8.899	0.6769	0.4107
601	2	1	0.03704	0.01351	1.2	0.07335	19.63	0.7548	0.385
901	1	0	0.01852	0	274600000	93850000	803400000	1.381	0.2399
1001	2	1	0.03704	0.01351	1.2	0.07335	19.63	0.7548	0.385
1101	3	2	0.05556	0.02703	0.9	0.09102	8.899	0.6769	0.4107
1301	2	2	0.03704	0.02703	0.6	0.05298	6.795	0.1033	0.7479
1401	0	1	0	0.01351	0	0	0	0.7355	0.3911
1701	0	2	0	0.02703	0	0	0	1.483	0.2234
1901	0	1	0	0.01351	0	0	0	0.7355	0.3911
2301	1	0	0.01852	0	274600000	93850000	803400000	1.381	0.2399
10401	1	3	0.01852	0.04054	0.2	0.01374	2.911	0.5001	0.4795
41601	1	0	0.01852	0	274600000	93850000	803400000	1.381	0.2399
---------
Exploratory	pass...done
Identifying	rare	haplotypes:	Alternative	likelihood...done	(95	evaluations)
Individual	tests:	Null	likelihood...done	(39	evaluations)
Null	likelihood...done	(39	evaluations)
Alternative	likelihood...done	(99	evaluations)
MARKER	OPTIONS
Test	marker:	6
TEST	OF	OVERALL	ASSOCIATION
Null	log-likelihood	=	-237.6
Alternative	log-likelihood	=	-227.3
Likelihood	ratio	chisq	=	20.54	df	=	11	p-value	=	0.03846
ESTIMATES	OF	ALLELE	EFFECTS
Reference	allele:	101
Allele	Case	Control	Ca-Freq	Co-Freq	Odds-R	95%Lo	95%Hi	Chisq	P-value
101	3	12	0.05556	0.1579	1	1	1	3.239	0.07189
102	10	16	0.1852	0.2105	2.5	0.5625	11.11	0.1267	0.7219
103	2	5	0.03704	0.06579	1.6	0.2017	12.69	0.5123	0.4742
104	0	1	0	0.01316	3.044e-08	3.044e-08	3.044e-08	0.716	0.3974
201	11	11	0.2037	0.1447	4	0.8781	18.22	0.7808	0.3769
301	3	10	0.05556	0.1316	1.2	0.197	7.311	2.027	0.1545
303	5	5	0.09259	0.06579	4	0.6805	23.51	0.3194	0.572
404	1	0	0.01852	0	4.481e+19	1.445e+19	1.389e+20	1.418	0.2337
501	9	12	0.1667	0.1579	3	0.6482	13.89	0.01793	0.8935
502	0	1	0	0.01316	3.044e-08	3.044e-08	3.044e-08	0.716	0.3974
505	10	2	0.1852	0.02632	20	2.772	144.3	9.51	0.002044
509	0	1	0	0.01316	3.044e-08	3.044e-08	3.044e-08	0.716	0.3974
---------
Exploratory	pass...done
Identifying	rare	haplotypes:	Alternative	likelihood...done	(95	evaluations)
Individual	tests:	Null	likelihood...done	(40	evaluations)
Null	likelihood...done	(40	evaluations)
Alternative	likelihood...done	(95	evaluations)
MARKER	OPTIONS
Test	marker:	7
TEST	OF	OVERALL	ASSOCIATION
Null	log-likelihood	=	-223.5
Alternative	log-likelihood	=	-215.8
Likelihood	ratio	chisq	=	15.34	df	=	10	p-value	=	0.12
ESTIMATES	OF	ALLELE	EFFECTS
Reference	allele:	201
Allele	Case	Control	Ca-Freq	Co-Freq	Odds-R	95%Lo	95%Hi	Chisq	P-value
201	9	12	0.1667	0.1622	1	1	1	0.004619	0.9458
202	11	10	0.2037	0.1351	1.467	0.4344	4.952	1.07	0.3009
301	15	8	0.2778	0.1081	2.5	0.7396	8.45	6.097	0.01354
302	3	10	0.05556	0.1351	0.4	0.08465	1.89	2.167	0.141
303	0	1	0	0.01351	0	0	0	0.7355	0.3911
402	1	0	0.01852	0	1872000000000	666400000000	5260000000000	1.381	0.2399
501	3	11	0.05556	0.1486	0.3636	0.07783	1.699	2.777	0.0956
503	0	1	0	0.01351	0	0	0	0.7355	0.3911
602	9	15	0.1667	0.2027	0.8	0.242	2.645	0.2661	0.606
603	2	5	0.03704	0.06757	0.5333	0.08355	3.404	0.5629	0.4531
604	1	1	0.01852	0.01351	1.333	0.07311	24.32	0.05084	0.8216
---------
Exploratory	pass...done
Identifying	rare	haplotypes:	Alternative	likelihood...done	(102	evaluations)
Individual	tests:	Null	likelihood...done	(44	evaluations)
Null	likelihood...done	(44	evaluations)
Alternative	likelihood...done	(109	evaluations)
MARKER	OPTIONS
Test	marker:	8
TEST	OF	OVERALL	ASSOCIATION
Null	log-likelihood	=	-270.1
Alternative	log-likelihood	=	-258.6
Likelihood	ratio	chisq	=	23.01	df	=	18	p-value	=	0.1901
ESTIMATES	OF	ALLELE	EFFECTS
Reference	allele:	101
Allele	Case	Control	Ca-Freq	Co-Freq	Odds-R	95%Lo	95%Hi	Chisq	P-value
101	3	9	0.05556	0.1184	1	1	1	1.489	0.2224
102	0	2	0	0.02632	0	0	0	1.443	0.2296
301	9	12	0.1667	0.1579	2.25	0.4697	10.78	0.01793	0.8935
401	6	7	0.1111	0.09211	2.571	0.4689	14.1	0.1267	0.7219
402	0	2	0	0.02632	0	0	0	1.443	0.2296
403	0	2	0	0.02632	0	0	0	1.443	0.2296
404	2	3	0.03704	0.03947	2	0.2182	18.33	0.005068	0.9432
407	0	1	0	0.01316	2.464e-08	2.464e-08	2.464e-08	0.716	0.3974
701	11	12	0.2037	0.1579	2.75	0.5886	12.85	0.4549	0.5
801	1	0	0.01852	0	77090000000000	24860000000000	239000000000000	1.418	0.2337
1101	5	1	0.09259	0.01316	15	1.215	185.2	4.525	0.03341
1102	1	0	0.01852	0	77090000000000	24860000000000	239000000000000	1.418	0.2337
1103	1	0	0.01852	0	77090000000000	24860000000000	239000000000000	1.418	0.2337
1104	2	2	0.03704	0.02632	3	0.2845	31.63	0.1217	0.7272
1201	1	0	0.01852	0	77090000000000	24860000000000	239000000000000	1.418	0.2337
1301	2	5	0.03704	0.06579	1.2	0.1474	9.768	0.5123	0.4742
1302	1	1	0.01852	0.01316	3	0.14	64.26	0.05989	0.8067
1401	0	1	0	0.01316	2.464e-08	2.464e-08	2.464e-08	0.716	0.3974
1501	9	16	0.1667	0.2105	1.688	0.3614	7.878	0.391	0.5318
---------
Exploratory	pass...done
Identifying	rare	haplotypes:	Alternative	likelihood...done	(19	evaluations)
Individual	tests:	Null	likelihood...done	(16	evaluations)
Null	likelihood...done	(16	evaluations)
Alternative	likelihood...done	(23	evaluations)
MARKER	OPTIONS
Test	marker:	9
TEST	OF	OVERALL	ASSOCIATION
Null	log-likelihood	=	-10.06
Alternative	log-likelihood	=	-9.194
Likelihood	ratio	chisq	=	1.726	df	=	2	p-value	=	0.4219
ESTIMATES	OF	ALLELE	EFFECTS
Reference	allele:	101
Allele	Case	Control	Ca-Freq	Co-Freq	Odds-R	95%Lo	95%Hi	Chisq	P-value
101	2	4	0.3333	0.6667	1	1	1	1.333	0.2482
202	3	1	0.5	0.1667	6	0.3544	101.6	1.5	0.2207
301	1	1	0.1667	0.1667	2	0.07753	51.6	4.53e-20	1
---------
Exploratory	pass...done
Identifying	rare	haplotypes:	Alternative	likelihood...done	(60	evaluations)
Individual	tests:	Null	likelihood...done	(17	evaluations)
Null	likelihood...done	(17	evaluations)
Alternative	likelihood...done	(60	evaluations)
MARKER	OPTIONS
Test	marker:	10
TEST	OF	OVERALL	ASSOCIATION
Null	log-likelihood	=	-2.558
Alternative	log-likelihood	=	-2.01
Likelihood	ratio	chisq	=	1.095	df	=	1	p-value	=	0.2954
ESTIMATES	OF	ALLELE	EFFECTS
Reference	allele:	101
Allele	Case	Control	Ca-Freq	Co-Freq	Odds-R	95%Lo	95%Hi	Chisq	P-value
101	0	1	0	0.1667	1	1	1	0.7407	0.3894
103	4	5	1	0.8333	88360000	88360000	88360000	0.7407	0.3894
---------
Exploratory	pass...done
Identifying	rare	haplotypes:	Alternative	likelihood...done	(1	evaluations)
Individual	tests:	Null	likelihood...done	(1	evaluations)
Null	likelihood...done	(1	evaluations)
Alternative	likelihood...done	(1	evaluations)
MARKER	OPTIONS
Test	marker:	11
TEST	OF	OVERALL	ASSOCIATION
Null	log-likelihood	=	0
Alternative	log-likelihood	=	0
Likelihood	ratio	chisq	=	0	df	=	0	p-value	=	1
ESTIMATES	OF	ALLELE	EFFECTS
Reference	allele:	101
Allele	Case	Control	Ca-Freq	Co-Freq	Odds-R	95%Lo	95%Hi	Chisq	P-value
101	0	2	-1.#IO	1	1	1	1	-1.#IO	1
---------
***END	OF	UNPHASED	3.0.13***

## Sheet: Sheet2
Patients who developed ALVAL in response to prostheses wearing at high rates (n=35) compared to asymptomatic patients with hips in situ > 10 years (n=61)
***START	OF	UNPHASED	3.0.13***
ANALYSIS	OPTIONS
Number	of	nuclear	families:	0
Number	of	unrelated	subjects:	96
Rare	haplotype	maximum	frequency	(-rare):	0
Zero	haplotype	maximum	frequency	(-zero):	1e-08
Quantitative	trait	variance	(-variance):	1
Model	normal	distribution	(-normal):	N
Restrict	to	certain	haplotypes	(-certain):	N
Estimate	missing	genotypes	(-missing):	N
Test	genotypes	(-genotype):	N
Condition	on	genotype	effects	(-condgenotype):	N
Assume	no	prior	linkage	(-nolinkage):	N
Model	odds	ratio	in	parents	(-parentrisk):	N
Use	only	one	family	based	control	(-onefbc):	N
Chromosome	X	(-chrX):	N
Chromosome	Y	(-chrY):	N
Convergence	threshold	(-epsilon):	1e-08
Numerical	maximisation	(-neldermead):	D-F-P
Random	restarts	(-restarts):	0
Random	number	seed	(-randomseed):	1
Number	of	permutations	(-permutation):	0
Permutation	distribution	quantile	(-quantile):	5
OUTPUT	OPTIONS
Output	file	(-output):
Brief	output	(-brief):	N
Output	LD	statistics	(-LD):	N
Output	permutation	analyses	(-permoutput):	N
Haplotype	dump	file	(-dump):
Just	the	most	likely	haplotypes	(-mostlikely):	N
---------
ANALYSIS	OF	BINARY	TRAIT:	Disease
Exploratory	pass...done
Identifying	rare	haplotypes:	Alternative	likelihood...done	(112	evaluations)
Individual	tests:	Null	likelihood...done	(48	evaluations)
Null	likelihood...done	(48	evaluations)
Alternative	likelihood...done	(112	evaluations)
MARKER	OPTIONS
Test	marker:	1
TEST	OF	OVERALL	ASSOCIATION
Null	log-likelihood	=	-381
Alternative	log-likelihood	=	-370.7
Likelihood	ratio	chisq	=	20.52	df	=	16	p-value	=	0.1975
ESTIMATES	OF	ALLELE	EFFECTS
Reference	allele:	101
Allele	Case	Control	Ca-Freq	Co-Freq	Odds-R	95%Lo	95%Hi	Chisq	P-value
101	13	26	0.1857	0.2131	1	1	1	0.2063	0.6497
201	14	30	0.2	0.2459	0.9333	0.3721	2.341	0.5305	0.4664
205	1	2	0.01429	0.01639	1	0.08282	12.07	0.01285	0.9098
301	13	23	0.1857	0.1885	1.13	0.4364	2.928	0.002306	0.9617
1101	2	9	0.02857	0.07377	0.4444	0.08362	2.362	1.682	0.1946
2301	1	2	0.01429	0.01639	1	0.08282	12.07	0.01285	0.9098
2402	3	7	0.04286	0.05738	0.8571	0.1898	3.87	0.1899	0.663
2501	2	1	0.02857	0.008197	4	0.3313	48.3	1.2	0.2732
2601	1	2	0.01429	0.01639	1	0.08282	12.07	0.01285	0.9098
2902	2	4	0.02857	0.03279	1	0.1615	6.192	0.02611	0.8716
3001	2	1	0.02857	0.008197	4	0.3313	48.3	1.2	0.2732
3002	2	0	0.02857	0	1118000000	531200000	2354000000	3.522	0.06054
3101	2	7	0.02857	0.05738	0.5714	0.1037	3.149	0.8261	0.3634
3201	4	5	0.05714	0.04098	1.6	0.3665	6.985	0.26	0.6101
3301	2	2	0.02857	0.01639	2	0.2524	15.85	0.3234	0.5696
6801	5	0	0.07143	0	1252000000	747700000	2097000000	8.947	0.002779
6802	1	1	0.01429	0.008197	2	0.1156	34.6	0.16	0.6892
---------
Exploratory	pass...done
Identifying	rare	haplotypes:	Alternative	likelihood...done	(134	evaluations)
Individual	tests:	Null	likelihood...done	(55	evaluations)
Null	likelihood...done	(55	evaluations)
Alternative	likelihood...done	(134	evaluations)
MARKER	OPTIONS
Test	marker:	2
TEST	OF	OVERALL	ASSOCIATION
Null	log-likelihood	=	-493.6
Alternative	log-likelihood	=	-478.8
Likelihood	ratio	chisq	=	29.66	df	=	29	p-value	=	0.4311
ESTIMATES	OF	ALLELE	EFFECTS
Reference	allele:	702
Allele	Case	Control	Ca-Freq	Co-Freq	Odds-R	95%Lo	95%Hi	Chisq	P-value
702	7	22	0.1	0.1803	1	1	1	2.238	0.1346
801	9	13	0.1286	0.1066	2.176	0.6538	7.241	0.2125	0.6448
1302	3	1	0.04286	0.008197	9.429	0.8403	105.8	2.619	0.1056
1401	1	2	0.01429	0.01639	1.571	0.1231	20.06	0.01285	0.9098
1402	2	4	0.02857	0.03279	1.571	0.2354	10.49	0.02611	0.8716
1501	3	7	0.04286	0.05738	1.347	0.2726	6.656	0.1899	0.663
1518	1	2	0.01429	0.01639	1.571	0.1231	20.06	0.01285	0.9098
1801	4	4	0.05714	0.03279	3.143	0.6182	15.98	0.6608	0.4163
2705	4	6	0.05714	0.04918	2.095	0.4562	9.623	0.05712	0.8111
3501	3	9	0.04286	0.07377	1.048	0.2203	4.981	0.7254	0.3944
3503	0	2	0	0.01639	0	0	0	1.16	0.2815
3701	2	0	0.02857	0	4364000000000000	1989000000000000	9574000000000000	3.522	0.06054
3901	0	2	0	0.01639	0	0	0	1.16	0.2815
3906	1	1	0.01429	0.008197	3.143	0.173	57.08	0.16	0.6892
4001	4	8	0.05714	0.06557	1.571	0.3609	6.842	0.05396	0.8163
4002	1	1	0.01429	0.008197	3.143	0.173	57.08	0.16	0.6892
4101	0	1	0	0.008197	4.521e-08	4.521e-08	4.521e-08	0.5768	0.4476
4102	0	1	0	0.008197	4.521e-08	4.521e-08	4.521e-08	0.5768	0.4476
4402	9	13	0.1286	0.1066	2.176	0.6538	7.241	0.2125	0.6448
4403	5	4	0.07143	0.03279	3.929	0.8207	18.81	1.487	0.2228
4501	0	1	0	0.008197	4.521e-08	4.521e-08	4.521e-08	0.5768	0.4476
4701	1	0	0.01429	0	4952000000000000	1737000000000000	1.412e+16	1.752	0.1856
4901	0	1	0	0.008197	4.521e-08	4.521e-08	4.521e-08	0.5768	0.4476
5001	2	0	0.02857	0	4364000000000000	1989000000000000	9574000000000000	3.522	0.06054
5002	1	0	0.01429	0	4952000000000000	1737000000000000	1.412e+16	1.752	0.1856
5101	3	8	0.04286	0.06557	1.179	0.2437	5.7	0.425	0.5145
5301	0	1	0	0.008197	4.521e-08	4.521e-08	4.521e-08	0.5768	0.4476
5501	1	1	0.01429	0.008197	3.143	0.173	57.08	0.16	0.6892
5601	1	1	0.01429	0.008197	3.143	0.173	57.08	0.16	0.6892
5701	2	6	0.02857	0.04918	1.048	0.1711	6.416	0.4731	0.4916
---------
Exploratory	pass...done
Identifying	rare	haplotypes:	Alternative	likelihood...done	(125	evaluations)
Individual	tests:	Null	likelihood...done	(55	evaluations)
Null	likelihood...done	(55	evaluations)
Alternative	likelihood...done	(125	evaluations)
MARKER	OPTIONS
Test	marker:	3
TEST	OF	OVERALL	ASSOCIATION
Null	log-likelihood	=	-434.9
Alternative	log-likelihood	=	-426.4
Likelihood	ratio	chisq	=	17.08	df	=	19	p-value	=	0.5842
ESTIMATES	OF	ALLELE	EFFECTS
Reference	allele:	102
Allele	Case	Control	Ca-Freq	Co-Freq	Odds-R	95%Lo	95%Hi	Chisq	P-value
102	3	6	0.04286	0.04918	1	1	1	0.0398	0.8419
202	3	3	0.04286	0.02459	2	0.2408	16.61	0.4903	0.4838
303	2	5	0.02857	0.04098	0.8	0.09346	6.848	0.1951	0.6587
304	7	10	0.1	0.08197	1.4	0.2585	7.582	0.1792	0.672
401	3	13	0.04286	0.1066	0.4615	0.07113	2.995	2.363	0.1243
501	9	14	0.1286	0.1148	1.286	0.2546	6.492	0.08054	0.7766
602	11	8	0.1571	0.06557	2.75	0.5237	14.44	4.183	0.04084
701	9	15	0.1286	0.123	1.2	0.239	6.025	0.01285	0.9098
702	9	23	0.1286	0.1885	0.7826	0.1603	3.822	1.151	0.2833
704	2	2	0.02857	0.01639	2	0.1813	22.06	0.3234	0.5696
802	3	5	0.04286	0.04098	1.2	0.1636	8.8	0.00391	0.9501
812	0	1	0	0.008197	0	0	0	0.5768	0.4476
1127	0	1	0	0.008197	0	0	0	0.5768	0.4476
1203	3	5	0.04286	0.04098	1.2	0.1636	8.8	0.00391	0.9501
1402	0	3	0	0.02459	0	0	0	1.749	0.186
1502	2	3	0.02857	0.02459	1.333	0.1387	12.82	0.0278	0.8676
1601	3	3	0.04286	0.02459	2	0.2408	16.61	0.4903	0.4838
1602	1	0	0.01429	0	1679000000000	541400000000	5205000000000	1.752	0.1856
1604	0	1	0	0.008197	0	0	0	0.5768	0.4476
1703	0	1	0	0.008197	0	0	0	0.5768	0.4476
---------
Exploratory	pass...done
Identifying	rare	haplotypes:	Alternative	likelihood...done	(149	evaluations)
Individual	tests:	Null	likelihood...done	(50	evaluations)
Null	likelihood...done	(50	evaluations)
Alternative	likelihood...done	(149	evaluations)
MARKER	OPTIONS
Test	marker:	4
TEST	OF	OVERALL	ASSOCIATION
Null	log-likelihood	=	-102.4
Alternative	log-likelihood	=	-96.19
Likelihood	ratio	chisq	=	12.34	df	=	6	p-value	=	0.05476
ESTIMATES	OF	ALLELE	EFFECTS
Reference	allele:	103
Allele	Case	Control	Ca-Freq	Co-Freq	Odds-R	95%Lo	95%Hi	Chisq	P-value
103	52	105	0.7429	0.8607	1	1	1	4.141	0.04186
104	1	0	0.01429	0	2.693e+117	1.001e+117	7.244e+117	1.752	0.1856
105	2	0	0.02857	0	9.451e+144	4.664e+144	1.915e+145	3.522	0.06054
115	0	1	0	0.008197	8.704e-08	8.704e-08	8.704e-08	0.5768	0.4476
201	14	13	0.2	0.1066	2.175	0.9531	4.961	3.214	0.07303
202	0	2	0	0.01639	0	0	0	1.16	0.2815
207	1	1	0.01429	0.008197	2.019	0.1238	32.93	0.16	0.6892
---------
Exploratory	pass...done
Identifying	rare	haplotypes:	Alternative	likelihood...done	(108	evaluations)
Individual	tests:	Null	likelihood...done	(47	evaluations)
Null	likelihood...done	(47	evaluations)
Alternative	likelihood...done	(113	evaluations)
MARKER	OPTIONS
Test	marker:	5
TEST	OF	OVERALL	ASSOCIATION
Null	log-likelihood	=	-328.1
Alternative	log-likelihood	=	-317.3
Likelihood	ratio	chisq	=	21.56	df	=	19	p-value	=	0.3069
ESTIMATES	OF	ALLELE	EFFECTS
Reference	allele:	101
Allele	Case	Control	Ca-Freq	Co-Freq	Odds-R	95%Lo	95%Hi	Chisq	P-value
101	5	3	0.07143	0.02459	1	1	1	2.444	0.118
201	6	14	0.08571	0.1148	0.2571	0.04598	1.438	0.402	0.5261
301	7	10	0.1	0.08197	0.42	0.0747	2.361	0.1792	0.672
401	32	60	0.4571	0.4918	0.32	0.07181	1.426	0.2141	0.6436
402	4	12	0.05714	0.09836	0.2	0.03225	1.24	0.9892	0.3199
501	0	2	0	0.01639	0	0	0	1.16	0.2815
601	1	5	0.01429	0.04098	0.12	0.009089	1.584	1.047	0.3061
901	1	0	0.01429	0	56720000	19390000	166000000	1.752	0.1856
1001	2	2	0.02857	0.01639	0.6	0.05298	6.795	0.3234	0.5696
1101	3	4	0.04286	0.03279	0.45	0.05672	3.57	0.1284	0.7201
1301	0	1	0	0.008197	0	0	0	0.5768	0.4476
1401	2	1	0.02857	0.008197	1.2	0.07335	19.63	1.2	0.2732
1601	2	0	0.02857	0	253400000	111600000	575300000	3.522	0.06054
1701	1	1	0.01429	0.008197	0.6	0.0265	13.58	0.16	0.6892
1901	1	1	0.01429	0.008197	0.6	0.0265	13.58	0.16	0.6892
2001	0	2	0	0.01639	0	0	0	1.16	0.2815
2301	1	0	0.01429	0	56720000	19390000	166000000	1.752	0.1856
3501	0	1	0	0.008197	0	0	0	0.5768	0.4476
8101	0	1	0	0.008197	0	0	0	0.5768	0.4476
10401	2	2	0.02857	0.01639	0.6	0.05298	6.795	0.3234	0.5696
---------
Exploratory	pass...done
Identifying	rare	haplotypes:	Alternative	likelihood...done	(107	evaluations)
Individual	tests:	Null	likelihood...done	(44	evaluations)
Null	likelihood...done	(44	evaluations)
Alternative	likelihood...done	(105	evaluations)
MARKER	OPTIONS
Test	marker:	6
TEST	OF	OVERALL	ASSOCIATION
Null	log-likelihood	=	-356.4
Alternative	log-likelihood	=	-347.4
Likelihood	ratio	chisq	=	18.04	df	=	11	p-value	=	0.08073
ESTIMATES	OF	ALLELE	EFFECTS
Reference	allele:	101
Allele	Case	Control	Ca-Freq	Co-Freq	Odds-R	95%Lo	95%Hi	Chisq	P-value
101	7	21	0.1	0.1721	1	1	1	1.858	0.1729
102	13	32	0.1857	0.2623	1.219	0.4176	3.557	1.454	0.2279
103	4	5	0.05714	0.04098	2.4	0.5	11.52	0.26	0.6101
104	5	1	0.07143	0.008197	15	1.487	151.3	5.874	0.01536
105	1	0	0.01429	0	90550000000000	31760000000000	258100000000000	1.752	0.1856
201	13	10	0.1857	0.08197	3.9	1.189	12.79	4.54	0.0331
301	4	10	0.05714	0.08197	1.2	0.284	5.07	0.4055	0.5243
302	0	1	0	0.008197	7.705e-08	7.705e-08	7.705e-08	0.5768	0.4476
303	6	15	0.08571	0.123	1.2	0.335	4.299	0.6331	0.4262
401	1	5	0.01429	0.04098	0.6	0.05948	6.052	1.047	0.3061
501	11	15	0.1571	0.123	2.2	0.6922	6.992	0.4441	0.5051
505	5	7	0.07143	0.05738	2.143	0.5121	8.967	0.1499	0.6986
---------
Exploratory	pass...done
Identifying	rare	haplotypes:	Alternative	likelihood...done	(115	evaluations)
Individual	tests:	Null	likelihood...done	(48	evaluations)
Null	likelihood...done	(48	evaluations)
Alternative	likelihood...done	(111	evaluations)
MARKER	OPTIONS
Test	marker:	7
TEST	OF	OVERALL	ASSOCIATION
Null	log-likelihood	=	-386.9
Alternative	log-likelihood	=	-371.7
Likelihood	ratio	chisq	=	30.5	df	=	14	p-value	=	0.006513
ESTIMATES	OF	ALLELE	EFFECTS
Reference	allele:	201
Allele	Case	Control	Ca-Freq	Co-Freq	Odds-R	95%Lo	95%Hi	Chisq	P-value
201	11	15	0.1571	0.123	1	1	1	0.4441	0.5051
202	10	6	0.1429	0.04918	2.273	0.634	8.147	5.11	0.02379
301	7	19	0.1	0.1557	0.5024	0.1568	1.61	1.18	0.2773
302	3	13	0.04286	0.1066	0.3147	0.07185	1.378	2.363	0.1243
303	3	5	0.04286	0.04098	0.8182	0.1604	4.172	0.00391	0.9501
305	1	0	0.01429	0	8341000000	2997000000	23210000000	1.752	0.1856
319	3	0	0.04286	0	46840000000	24740000000	88690000000	5.312	0.02118
402	2	5	0.02857	0.04098	0.5455	0.08882	3.35	0.1951	0.6587
501	8	21	0.1143	0.1721	0.5195	0.1684	1.602	1.161	0.2813
502	0	1	0	0.008197	1.399e-08	1.399e-08	1.399e-08	0.5768	0.4476
503	5	1	0.07143	0.008197	6.818	0.6948	66.91	5.874	0.01536
602	13	23	0.1857	0.1885	0.7708	0.2742	2.166	0.002306	0.9617
603	4	6	0.05714	0.04918	0.9091	0.2059	4.015	0.05712	0.8111
604	0	6	0	0.04918	0	0	0	3.554	0.05941
609	0	1	0	0.008197	1.399e-08	1.399e-08	1.399e-08	0.5768	0.4476
---------
Exploratory	pass...done
Identifying	rare	haplotypes:	Alternative	likelihood...done	(132	evaluations)
Individual	tests:	Null	likelihood...done	(51	evaluations)
Null	likelihood...done	(51	evaluations)
Alternative	likelihood...done	(122	evaluations)
MARKER	OPTIONS
Test	marker:	8
TEST	OF	OVERALL	ASSOCIATION
Null	log-likelihood	=	-433.8
Alternative	log-likelihood	=	-409.4
Likelihood	ratio	chisq	=	48.77	df	=	24	p-value	=	0.002024
ESTIMATES	OF	ALLELE	EFFECTS
Reference	allele:	101
Allele	Case	Control	Ca-Freq	Co-Freq	Odds-R	95%Lo	95%Hi	Chisq	P-value
101	6	14	0.08571	0.1148	1	1	1	0.402	0.5261
102	1	4	0.01429	0.03279	0.5833	0.0534	6.372	0.6003	0.4385
103	0	5	0	0.04098	0	0	0	2.946	0.08611
301	11	15	0.1571	0.123	1.711	0.4987	5.871	0.4441	0.5051
401	6	16	0.08571	0.1311	0.875	0.2292	3.341	0.905	0.3415
403	1	0	0.01429	0	2684000000000	931100000000	7734000000000	1.752	0.1856
404	1	7	0.01429	0.05738	0.3333	0.03331	3.336	2.068	0.1504
405	0	1	0	0.008197	1.41e-08	1.41e-08	1.41e-08	0.5768	0.4476
406	1	0	0.01429	0	2684000000000	931100000000	7734000000000	1.752	0.1856
407	1	0	0.01429	0	2684000000000	931100000000	7734000000000	1.752	0.1856
408	0	1	0	0.008197	1.41e-08	1.41e-08	1.41e-08	0.5768	0.4476
701	13	10	0.1857	0.08197	3.033	0.8581	10.72	4.54	0.0331
801	1	5	0.01429	0.04098	0.4667	0.04449	4.895	1.047	0.3061
901	0	1	0	0.008197	1.41e-08	1.41e-08	1.41e-08	0.5768	0.4476
1001	1	0	0.01429	0	2684000000000	931100000000	7734000000000	1.752	0.1856
1101	1	2	0.01429	0.01639	1.167	0.08805	15.46	0.01285	0.9098
1102	3	0	0.04286	0	5634000000000	2817000000000	11270000000000	5.312	0.02118
1103	1	0	0.01429	0	2684000000000	931100000000	7734000000000	1.752	0.1856
1104	0	1	0	0.008197	1.41e-08	1.41e-08	1.41e-08	0.5768	0.4476
1201	0	2	0	0.01639	0	0	0	1.16	0.2815
1301	4	5	0.05714	0.04098	1.867	0.3673	9.488	0.26	0.6101
1302	0	7	0	0.05738	0	0	0	4.168	0.04119
1454	5	1	0.07143	0.008197	11.67	1.112	122.4	5.874	0.01536
1501	13	24	0.1857	0.1967	1.264	0.392	4.075	0.03464	0.8524
1601	0	1	0	0.008197	1.41e-08	1.41e-08	1.41e-08	0.5768	0.4476
---------
Exploratory	pass...done
Identifying	rare	haplotypes:	Alternative	likelihood...done	(64	evaluations)
Individual	tests:	Null	likelihood...done	(17	evaluations)
Null	likelihood...done	(17	evaluations)
Alternative	likelihood...done	(65	evaluations)
MARKER	OPTIONS
Test	marker:	9
TEST	OF	OVERALL	ASSOCIATION
Null	log-likelihood	=	-23.73
Alternative	log-likelihood	=	-20.3
Likelihood	ratio	chisq	=	6.858	df	=	3	p-value	=	0.07656
ESTIMATES	OF	ALLELE	EFFECTS
Reference	allele:	101
Allele	Case	Control	Ca-Freq	Co-Freq	Odds-R	95%Lo	95%Hi	Chisq	P-value
101	3	5	0.3	0.3571	1	1	1	0.08571	0.7697
103	2	0	0.2	0	11060000000	4522000000	27060000000	3.055	0.08051
202	5	6	0.5	0.4286	1.389	0.2163	8.917	0.1199	0.7292
301	0	3	0	0.2143	0	0	0	2.449	0.1176
---------
Exploratory	pass...done
Identifying	rare	haplotypes:	Alternative	likelihood...done	(72	evaluations)
Individual	tests:	Null	likelihood...done	(24	evaluations)
Null	likelihood...done	(24	evaluations)
Alternative	likelihood...done	(72	evaluations)
MARKER	OPTIONS
Test	marker:	10
TEST	OF	OVERALL	ASSOCIATION
Null	log-likelihood	=	-3.277
Alternative	log-likelihood	=	-2.909
Likelihood	ratio	chisq	=	0.7357	df	=	1	p-value	=	0.391
ESTIMATES	OF	ALLELE	EFFECTS
Reference	allele:	101
Allele	Case	Control	Ca-Freq	Co-Freq	Odds-R	95%Lo	95%Hi	Chisq	P-value
101	0	1	0	0.07143	1	1	1	0.4511	0.5018
103	6	13	1	0.9286	89790000	89790000	89790000	0.4511	0.5018
---------
Exploratory	pass...done
Identifying	rare	haplotypes:	Alternative	likelihood...done	(1	evaluations)
Individual	tests:	Null	likelihood...done	(1	evaluations)
Null	likelihood...done	(1	evaluations)
Alternative	likelihood...done	(1	evaluations)
MARKER	OPTIONS
Test	marker:	11
TEST	OF	OVERALL	ASSOCIATION
Null	log-likelihood	=	0
Alternative	log-likelihood	=	0
Likelihood	ratio	chisq	=	0	df	=	0	p-value	=	1
ESTIMATES	OF	ALLELE	EFFECTS
Reference	allele:	101
Allele	Case	Control	Ca-Freq	Co-Freq	Odds-R	95%Lo	95%Hi	Chisq	P-value
101	2	2	1	1	1	1	1	-1.#IO	1
---------
***END	OF	UNPHASED	3.0.13***

## Sheet: Sheet3
Patients who developed failure of prostheses - all wear rates all histological responses (n=100) - compared to asymptomatic patients with hips in situ > 10 years (n=61)
***START	OF	UNPHASED	3.0.13***
ANALYSIS	OPTIONS
Number	of	nuclear	families:	0
Number	of	unrelated	subjects:	161
Rare	haplotype	maximum	frequency	(-rare):	0
Zero	haplotype	maximum	frequency	(-zero):	1e-08
Quantitative	trait	variance	(-variance):	1
Model	normal	distribution	(-normal):	N
Restrict	to	certain	haplotypes	(-certain):	N
Estimate	missing	genotypes	(-missing):	N
Test	genotypes	(-genotype):	N
Condition	on	genotype	effects	(-condgenotype):	N
Assume	no	prior	linkage	(-nolinkage):	N
Model	odds	ratio	in	parents	(-parentrisk):	N
Use	only	one	family	based	control	(-onefbc):	N
Chromosome	X	(-chrX):	N
Chromosome	Y	(-chrY):	N
Convergence	threshold	(-epsilon):	1e-08
Numerical	maximisation	(-neldermead):	D-F-P
Random	restarts	(-restarts):	0
Random	number	seed	(-randomseed):	1
Number	of	permutations	(-permutation):	0
Permutation	distribution	quantile	(-quantile):	5
OUTPUT	OPTIONS
Output	file	(-output):
Brief	output	(-brief):	N
Output	LD	statistics	(-LD):	N
Output	permutation	analyses	(-permoutput):	N
Haplotype	dump	file	(-dump):
Just	the	most	likely	haplotypes	(-mostlikely):	N
---------
ANALYSIS	OF	BINARY	TRAIT:	Disease
Exploratory	pass...done
Identifying	rare	haplotypes:	Alternative	likelihood...done	(129	evaluations)
Individual	tests:	Null	likelihood...done	(52	evaluations)
Null	likelihood...done	(52	evaluations)
Alternative	likelihood...done	(134	evaluations)
MARKER	OPTIONS
Test	marker:	1
TEST	OF	OVERALL	ASSOCIATION
Null	log-likelihood	=	-641.4
Alternative	log-likelihood	=	-629.7
Likelihood	ratio	chisq	=	23.47	df	=	18	p-value	=	0.1731
ESTIMATES	OF	ALLELE	EFFECTS
Reference	allele:	101
Allele	Case	Control	Ca-Freq	Co-Freq	Odds-R	95%Lo	95%Hi	Chisq	P-value
101	35	26	0.175	0.2131	1	1	1	0.7169	0.3972
201	52	30	0.26	0.2459	1.288	0.6538	2.536	0.07935	0.7782
205	2	2	0.01	0.01639	0.7429	0.09809	5.626	0.2525	0.6153
301	35	23	0.175	0.1885	1.13	0.5442	2.348	0.09386	0.7593
305	1	0	0.005	0	414800000	153500000	1121000000	0.6119	0.4341
1101	7	9	0.035	0.07377	0.5778	0.1903	1.754	2.412	0.1204
2301	4	2	0.02	0.01639	1.486	0.2527	8.737	0.0539	0.8164
2402	14	7	0.07	0.05738	1.486	0.5254	4.202	0.198	0.6563
2403	1	0	0.005	0	414800000	153500000	1121000000	0.6119	0.4341
2501	3	1	0.015	0.008197	2.229	0.2191	22.66	0.2859	0.5929
2601	2	2	0.01	0.01639	0.7429	0.09809	5.626	0.2525	0.6153
2902	7	4	0.035	0.03279	1.3	0.3441	4.911	0.01125	0.9155
3001	2	1	0.01	0.008197	1.486	0.1278	17.28	0.0267	0.8702
3002	4	0	0.02	0	337100000	201000000	565400000	2.471	0.116
3101	4	7	0.02	0.05738	0.4245	0.1124	1.604	3.209	0.07326
3201	9	5	0.045	0.04098	1.337	0.4006	4.463	0.02939	0.8639
3301	5	2	0.025	0.01639	1.857	0.3337	10.34	0.2639	0.6074
6801	11	0	0.055	0	329500000	234800000	462400000	6.947	0.008394
6802	2	1	0.01	0.008197	1.486	0.1278	17.28	0.0267	0.8702
---------
Exploratory	pass...done
Identifying	rare	haplotypes:	Alternative	likelihood...done	(156	evaluations)
Individual	tests:	Null	likelihood...done	(62	evaluations)
Null	likelihood...done	(62	evaluations)
Alternative	likelihood...done	(156	evaluations)
MARKER	OPTIONS
Test	marker:	2
TEST	OF	OVERALL	ASSOCIATION
Null	log-likelihood	=	-830.4
Alternative	log-likelihood	=	-813.9
Likelihood	ratio	chisq	=	32.98	df	=	35	p-value	=	0.5658
ESTIMATES	OF	ALLELE	EFFECTS
Reference	allele:	702
Allele	Case	Control	Ca-Freq	Co-Freq	Odds-R	95%Lo	95%Hi	Chisq	P-value
702	27	22	0.1364	0.1803	1	1	1	1.125	0.2888
707	1	0	0.005051	0	1540000000000	567600000000	4177000000000	0.6181	0.4318
801	28	13	0.1414	0.1066	1.755	0.7383	4.171	0.821	0.3649
812	1	0	0.005051	0	1540000000000	567600000000	4177000000000	0.6181	0.4318
1302	7	1	0.03535	0.008197	5.704	0.6515	49.94	2.284	0.1307
1401	5	2	0.02525	0.01639	2.037	0.3598	11.53	0.2769	0.5987
1402	6	4	0.0303	0.03279	1.222	0.306	4.881	0.01538	0.9013
1501	16	7	0.08081	0.05738	1.862	0.6507	5.331	0.6213	0.4306
1518	1	2	0.005051	0.01639	0.4074	0.03461	4.796	1.046	0.3065
1801	7	4	0.03535	0.03279	1.426	0.3692	5.508	0.01498	0.9026
2705	7	6	0.03535	0.04918	0.9506	0.2786	3.243	0.3703	0.5428
3501	11	9	0.05556	0.07377	0.9959	0.3501	2.833	0.4274	0.5132
3502	1	0	0.005051	0	1540000000000	567600000000	4177000000000	0.6181	0.4318
3503	2	2	0.0101	0.01639	0.8148	0.106	6.262	0.2421	0.6227
3701	2	0	0.0101	0	8681000000000	4233000000000	17800000000000	1.24	0.2655
3801	2	0	0.0101	0	8681000000000	4233000000000	17800000000000	1.24	0.2655
3901	2	2	0.0101	0.01639	0.8148	0.106	6.262	0.2421	0.6227
3906	1	1	0.005051	0.008197	0.8148	0.04816	13.79	0.1203	0.7287
4001	9	8	0.04545	0.06557	0.9167	0.3032	2.771	0.6074	0.4358
4002	1	1	0.005051	0.008197	0.8148	0.04816	13.79	0.1203	0.7287
4101	0	1	0	0.008197	0	0	0	1.628	0.202
4102	0	1	0	0.008197	0	0	0	1.628	0.202
4402	23	13	0.1162	0.1066	1.442	0.5962	3.485	0.06974	0.7917
4403	13	4	0.06566	0.03279	2.648	0.7556	9.281	1.621	0.2029
4501	2	1	0.0101	0.008197	1.63	0.1384	19.18	0.02948	0.8637
4701	1	0	0.005051	0	1540000000000	567600000000	4177000000000	0.6181	0.4318
4901	0	1	0	0.008197	0	0	0	1.628	0.202
5001	3	0	0.01515	0	15740000000000	8669000000000	28580000000000	1.866	0.1719
5002	1	0	0.005051	0	1540000000000	567600000000	4177000000000	0.6181	0.4318
5101	6	8	0.0303	0.06557	0.6111	0.1843	2.027	2.245	0.1341
5301	1	1	0.005051	0.008197	0.8148	0.04816	13.79	0.1203	0.7287
5501	3	1	0.01515	0.008197	2.444	0.2373	25.18	0.2958	0.5865
5601	1	1	0.005051	0.008197	0.8148	0.04816	13.79	0.1203	0.7287
5701	5	6	0.02525	0.04918	0.679	0.1826	2.526	1.302	0.2538
15220	1	0	0.005051	0	1540000000000	567600000000	4177000000000	0.6181	0.4318
44110	1	0	0.005051	0	1540000000000	567600000000	4177000000000	0.6181	0.4318
---------
Exploratory	pass...done
Identifying	rare	haplotypes:	Alternative	likelihood...done	(129	evaluations)
Individual	tests:	Null	likelihood...done	(64	evaluations)
Null	likelihood...done	(64	evaluations)
Alternative	likelihood...done	(136	evaluations)
MARKER	OPTIONS
Test	marker:	3
TEST	OF	OVERALL	ASSOCIATION
Null	log-likelihood	=	-709
Alternative	log-likelihood	=	-699.9
Likelihood	ratio	chisq	=	18.13	df	=	19	p-value	=	0.514
ESTIMATES	OF	ALLELE	EFFECTS
Reference	allele:	102
Allele	Case	Control	Ca-Freq	Co-Freq	Odds-R	95%Lo	95%Hi	Chisq	P-value
102	5	6	0.02551	0.04918	1	1	1	1.262	0.2614
202	7	3	0.03571	0.02459	2.8	0.4631	16.93	0.3055	0.5804
303	12	5	0.06122	0.04098	2.88	0.5931	13.99	0.6088	0.4352
304	13	10	0.06633	0.08197	1.56	0.3677	6.618	0.2742	0.6006
401	17	13	0.08673	0.1066	1.569	0.3911	6.296	0.3458	0.5565
501	22	14	0.1122	0.1148	1.886	0.4826	7.369	0.004716	0.9453
602	21	8	0.1071	0.06557	3.15	0.7468	13.29	1.568	0.2105
701	29	15	0.148	0.123	2.32	0.6071	8.865	0.3945	0.53
702	33	23	0.1684	0.1885	1.722	0.4689	6.323	0.2106	0.6463
704	3	2	0.01531	0.01639	1.8	0.2103	15.41	0.005744	0.9396
802	11	5	0.05612	0.04098	2.64	0.5387	12.94	0.3607	0.5481
812	0	1	0	0.008197	0	0	0	1.612	0.2043
1127	0	1	0	0.008197	0	0	0	1.612	0.2043
1203	8	5	0.04082	0.04098	1.92	0.3762	9.8	5.367e-05	0.9942
1402	1	3	0.005102	0.02459	0.4	0.03106	5.151	2.299	0.1294
1502	3	3	0.01531	0.02459	1.2	0.1636	8.8	0.3501	0.554
1601	9	3	0.04592	0.02459	3.6	0.6161	21.03	0.942	0.3318
1602	2	0	0.0102	0	284400000000000	125300000000000	645600000000000	1.253	0.263
1604	0	1	0	0.008197	0	0	0	1.612	0.2043
1703	0	1	0	0.008197	0	0	0	1.612	0.2043
---------
Exploratory	pass...done
Identifying	rare	haplotypes:	Alternative	likelihood...done	(144	evaluations)
Individual	tests:	Null	likelihood...done	(51	evaluations)
Null	likelihood...done	(51	evaluations)
Alternative	likelihood...done	(144	evaluations)
MARKER	OPTIONS
Test	marker:	4
TEST	OF	OVERALL	ASSOCIATION
Null	log-likelihood	=	-184.1
Alternative	log-likelihood	=	-178.3
Likelihood	ratio	chisq	=	11.59	df	=	7	p-value	=	0.1149
ESTIMATES	OF	ALLELE	EFFECTS
Reference	allele:	103
Allele	Case	Control	Ca-Freq	Co-Freq	Odds-R	95%Lo	95%Hi	Chisq	P-value
103	151	105	0.7626	0.8607	1	1	1	4.534	0.03323
104	1	0	0.005051	0	1381000000000	516500000000	3691000000000	0.6181	0.4318
105	2	0	0.0101	0	164100000	81670000	329500000	1.24	0.2655
115	0	1	0	0.008197	0	0	0	1.628	0.202
201	35	13	0.1768	0.1066	1.872	0.9451	3.709	2.919	0.08757
202	5	2	0.02525	0.01639	1.738	0.331	9.131	0.2769	0.5987
206	3	0	0.01515	0	69470000	39230000	123000000	1.866	0.1719
207	1	1	0.005051	0.008197	0.6954	0.04301	11.24	0.1203	0.7287
---------
Exploratory	pass...done
Identifying	rare	haplotypes:	Alternative	likelihood...done	(137	evaluations)
Individual	tests:	Null	likelihood...done	(56	evaluations)
Null	likelihood...done	(56	evaluations)
Alternative	likelihood...done	(133	evaluations)
MARKER	OPTIONS
Test	marker:	5
TEST	OF	OVERALL	ASSOCIATION
Null	log-likelihood	=	-566.6
Alternative	log-likelihood	=	-555.6
Likelihood	ratio	chisq	=	21.97	df	=	20	p-value	=	0.3421
ESTIMATES	OF	ALLELE	EFFECTS
Reference	allele:	101
Allele	Case	Control	Ca-Freq	Co-Freq	Odds-R	95%Lo	95%Hi	Chisq	P-value
101	13	3	0.06566	0.02459	1	1	1	2.68	0.1016
201	19	14	0.09596	0.1148	0.3132	0.07475	1.312	0.2883	0.5913
301	14	10	0.07071	0.08197	0.3231	0.07246	1.441	0.138	0.7103
401	88	60	0.4444	0.4918	0.3385	0.09246	1.239	0.6811	0.4092
402	17	12	0.08586	0.09836	0.3269	0.07617	1.403	0.1432	0.7052
501	5	2	0.02525	0.01639	0.5769	0.07315	4.55	0.2769	0.5987
601	4	5	0.0202	0.04098	0.1846	0.02998	1.137	1.193	0.2748
901	2	0	0.0101	0	652800000	310100000	1374000000	1.24	0.2655
1001	5	2	0.02525	0.01639	0.5769	0.07315	4.55	0.2769	0.5987
1101	8	4	0.0404	0.03279	0.4615	0.08127	2.621	0.1213	0.7276
1301	4	1	0.0202	0.008197	0.9231	0.07386	11.54	0.7074	0.4003
1401	3	1	0.01515	0.008197	0.6923	0.05204	9.211	0.2958	0.5865
1601	2	0	0.0101	0	652800000	310100000	1374000000	1.24	0.2655
1701	3	1	0.01515	0.008197	0.6923	0.05204	9.211	0.2958	0.5865
1901	2	1	0.0101	0.008197	0.4615	0.03074	6.929	0.02948	0.8637
2001	0	2	0	0.01639	0	0	0	3.266	0.07072
2301	2	0	0.0101	0	652800000	310100000	1374000000	1.24	0.2655
3501	0	1	0	0.008197	0	0	0	1.628	0.202
8101	0	1	0	0.008197	0	0	0	1.628	0.202
10401	6	2	0.0303	0.01639	0.6923	0.09056	5.292	0.5992	0.4389
41601	1	0	0.005051	0	47030000	17010000	130000000	0.6181	0.4318
---------
Exploratory	pass...done
Identifying	rare	haplotypes:	Alternative	likelihood...done	(127	evaluations)
Individual	tests:	Null	likelihood...done	(52	evaluations)
Null	likelihood...done	(52	evaluations)
Alternative	likelihood...done	(144	evaluations)
MARKER	OPTIONS
Test	marker:	6		DQA1
TEST	OF	OVERALL	ASSOCIATION
Null	log-likelihood	=	-604.6
Alternative	log-likelihood	=	-592.1
Likelihood	ratio	chisq	=	24.91	df	=	14	p-value	=	0.0355
ESTIMATES	OF	ALLELE	EFFECTS
Reference	allele:	101
Allele	Case	Control	Ca-Freq	Co-Freq	Odds-R	95%Lo	95%Hi	Chisq	P-value
101	22	21	0.11	0.1721	1	1	1	2.528	0.1118
102	39	32	0.195	0.2623	1.163	0.5446	2.485	1.997	0.1577
103	11	5	0.055	0.04098	2.1	0.6234	7.074	0.3153	0.5745
104	6	1	0.03	0.008197	5.727	0.6347	51.68	1.694	0.1931
105	1	0	0.005	0	9.602e+44	3.525e+44	2.615e+45	0.6119	0.4341
201	35	10	0.175	0.08197	3.341	1.328	8.406	5.455	0.01951
301	17	10	0.085	0.08197	1.623	0.6068	4.34	0.009072	0.9241
302	0	1	0	0.008197	1.302e-07	1.302e-07	1.302e-07	1.644	0.1997
303	16	15	0.08	0.123	1.018	0.4041	2.565	1.607	0.205
401	1	5	0.005	0.04098	0.1909	0.02055	1.773	5.366	0.02054
404	1	0	0.005	0	9.602e+44	3.525e+44	2.615e+45	0.6119	0.4341
501	32	15	0.16	0.123	2.036	0.8647	4.796	0.8344	0.361
502	1	0	0.005	0	9.602e+44	3.525e+44	2.615e+45	0.6119	0.4341
505	17	7	0.085	0.05738	2.318	0.7999	6.719	0.8382	0.3599
509	1	0	0.005	0	9.602e+44	3.525e+44	2.615e+45	0.6119	0.4341
---------
Exploratory	pass...done
Identifying	rare	haplotypes:	Alternative	likelihood...done	(137	evaluations)
Individual	tests:	Null	likelihood...done	(56	evaluations)
Null	likelihood...done	(56	evaluations)
Alternative	likelihood...done	(137	evaluations)
MARKER	OPTIONS
Test	marker:	7
TEST	OF	OVERALL	ASSOCIATION
Null	log-likelihood	=	-621.8
Alternative	log-likelihood	=	-607.2
Likelihood	ratio	chisq	=	29.16	df	=	14	p-value	=	0.009928
ESTIMATES	OF	ALLELE	EFFECTS
Reference	allele:	201
Allele	Case	Control	Ca-Freq	Co-Freq	Odds-R	95%Lo	95%Hi	Chisq	P-value
201	32	15	0.1616	0.123	1	1	1	0.9007	0.3426
202	31	6	0.1566	0.04918	2.422	0.8325	7.046	8.513	0.003526
301	30	19	0.1515	0.1557	0.7401	0.3194	1.715	0.01038	0.9189
302	16	13	0.08081	0.1066	0.5769	0.222	1.499	0.6073	0.4358
303	4	5	0.0202	0.04098	0.375	0.08789	1.6	1.193	0.2748
305	1	0	0.005051	0	6.699e+30	2.476e+30	1.812e+31	0.6181	0.4318
319	3	0	0.01515	0	3.765e+28	2.083e+28	6.804e+28	1.866	0.1719
402	3	5	0.01515	0.04098	0.2813	0.05926	1.335	2.067	0.1506
501	22	21	0.1111	0.1721	0.4911	0.2085	1.157	2.416	0.1201
502	0	1	0	0.008197	0	0	0	1.628	0.202
503	6	1	0.0303	0.008197	2.812	0.3104	25.49	1.724	0.1892
602	37	23	0.1869	0.1885	0.7541	0.3374	1.686	0.001359	0.9706
603	11	6	0.05556	0.04918	0.8594	0.2671	2.765	0.06099	0.8049
604	2	6	0.0101	0.04918	0.1563	0.02815	0.8672	4.73	0.02965
609	0	1	0	0.008197	0	0	0	1.628	0.202
---------
Exploratory	pass...done
Identifying	rare	haplotypes:	Alternative	likelihood...done	(136	evaluations)
Individual	tests:	Null	likelihood...done	(61	evaluations)
Null	likelihood...done	(61	evaluations)
Alternative	likelihood...done	(152	evaluations)
MARKER	OPTIONS
Test	marker:	8
TEST	OF	OVERALL	ASSOCIATION
Null	log-likelihood	=	-722.3
Alternative	log-likelihood	=	-694.1
Likelihood	ratio	chisq	=	56.33	df	=	26	p-value	=	0.0005119
ESTIMATES	OF	ALLELE	EFFECTS
Reference	allele:	101
Allele	Case	Control	Ca-Freq	Co-Freq	Odds-R	95%Lo	95%Hi	Chisq	P-value
101	18	14	0.09	0.1148	1	1	1	0.5188	0.4714
102	3	4	0.015	0.03279	0.5833	0.1118	3.043	1.127	0.2884
103	0	5	0	0.04098	0	0	0	8.326	0.003908
301	32	15	0.16	0.123	1.659	0.655	4.203	0.8344	0.361
401	19	16	0.095	0.1311	0.9236	0.3521	2.423	1.022	0.312
402	2	0	0.01	0	2.22e+18	1.069e+18	4.609e+18	1.228	0.2679
403	3	0	0.015	0	2.227e+18	1.209e+18	4.104e+18	1.847	0.1741
404	6	7	0.03	0.05738	0.6667	0.1826	2.434	1.466	0.226
405	0	1	0	0.008197	0	0	0	1.644	0.1997
406	1	0	0.005	0	3.506e+17	1.281e+17	9.596e+17	0.6119	0.4341
407	2	0	0.01	0	2.22e+18	1.069e+18	4.609e+18	1.228	0.2679
408	0	1	0	0.008197	0	0	0	1.644	0.1997
701	36	10	0.18	0.08197	2.8	1.041	7.53	5.947	0.01474
801	2	5	0.01	0.04098	0.3111	0.05234	1.849	3.421	0.06439
901	0	1	0	0.008197	0	0	0	1.644	0.1997
1001	1	0	0.005	0	3.506e+17	1.281e+17	9.596e+17	0.6119	0.4341
1101	7	2	0.035	0.01639	2.722	0.4876	15.2	0.9656	0.3258
1102	4	0	0.02	0	3.176e+18	1.847e+18	5.459e+18	2.471	0.116
1103	2	0	0.01	0	2.22e+18	1.069e+18	4.609e+18	1.228	0.2679
1104	4	1	0.02	0.008197	3.111	0.3119	31.03	0.6906	0.406
1201	1	2	0.005	0.01639	0.3889	0.03192	4.738	1.066	0.3019
1301	11	5	0.055	0.04098	1.711	0.482	6.075	0.3153	0.5745
1302	2	7	0.01	0.05738	0.2222	0.0398	1.241	6.26	0.01235
1401	1	0	0.005	0	3.506e+17	1.281e+17	9.596e+17	0.6119	0.4341
1454	5	1	0.025	0.008197	3.889	0.4067	37.19	1.17	0.2794
1501	38	24	0.19	0.1967	1.231	0.5183	2.926	0.02202	0.882
1601	0	1	0	0.008197	0	0	0	1.644	0.1997
---------
Exploratory	pass...done
Identifying	rare	haplotypes:	Alternative	likelihood...done	(66	evaluations)
Individual	tests:	Null	likelihood...done	(23	evaluations)
Null	likelihood...done	(23	evaluations)
Alternative	likelihood...done	(65	evaluations)
MARKER	OPTIONS
Test	marker:	9
TEST	OF	OVERALL	ASSOCIATION
Null	log-likelihood	=	-35.07
Alternative	log-likelihood	=	-33.6
Likelihood	ratio	chisq	=	2.944	df	=	3	p-value	=	0.4003
ESTIMATES	OF	ALLELE	EFFECTS
Reference	allele:	101
Allele	Case	Control	Ca-Freq	Co-Freq	Odds-R	95%Lo	95%Hi	Chisq	P-value
101	9	5	0.4091	0.3571	1	1	1	0.09715	0.7553
103	2	0	0.09091	0	127700000	59350000	274700000	1.348	0.2457
202	9	6	0.4091	0.4286	0.8333	0.1852	3.75	0.01336	0.908
301	2	3	0.09091	0.2143	0.3704	0.0455	3.015	1.089	0.2967
---------
Exploratory	pass...done
Identifying	rare	haplotypes:	Alternative	likelihood...done	(34	evaluations)
Individual	tests:	Null	likelihood...done	(21	evaluations)
Null	likelihood...done	(21	evaluations)
Alternative	likelihood...done	(34	evaluations)
MARKER	OPTIONS
Test	marker:	10
TEST	OF	OVERALL	ASSOCIATION
Null	log-likelihood	=	-5.962
Alternative	log-likelihood	=	-5.957
Likelihood	ratio	chisq	=	0.009547	df	=	1	p-value	=	0.9222
ESTIMATES	OF	ALLELE	EFFECTS
Reference	allele:	101
Allele	Case	Control	Ca-Freq	Co-Freq	Odds-R	95%Lo	95%Hi	Chisq	P-value
101	1	1	0.0625	0.07143	1	1	1	0.009566	0.9221
103	15	13	0.9375	0.9286	1.154	0.06545	20.34	0.009566	0.9221
---------
Exploratory	pass...done
Identifying	rare	haplotypes:	Alternative	likelihood...done	(1	evaluations)
Individual	tests:	Null	likelihood...done	(1	evaluations)
Null	likelihood...done	(1	evaluations)
Alternative	likelihood...done	(1	evaluations)
MARKER	OPTIONS
Test	marker:	11
TEST	OF	OVERALL	ASSOCIATION
Null	log-likelihood	=	0
Alternative	log-likelihood	=	0
Likelihood	ratio	chisq	=	0	df	=	0	p-value	=	1
ESTIMATES	OF	ALLELE	EFFECTS
Reference	allele:	101
Allele	Case	Control	Ca-Freq	Co-Freq	Odds-R	95%Lo	95%Hi	Chisq	P-value
101	4	2	1	1	1	1	1	-1.#IO	1
---------
***END	OF	UNPHASED	3.0.13***

## Sheet: Sheet4
ALVAL patients with lower wear (n=27) compared to asymptomatic patients with hips in situ > 10 years (n=61)
***START	OF	UNPHASED	3.0.13***
ANALYSIS	OPTIONS
Number	of	nuclear	families:	0
Number	of	unrelated	subjects:	88
Rare	haplotype	maximum	frequency	(-rare):	0
Zero	haplotype	maximum	frequency	(-zero):	1e-08
Quantitative	trait	variance	(-variance):	1
Model	normal	distribution	(-normal):	N
Restrict	to	certain	haplotypes	(-certain):	N
Estimate	missing	genotypes	(-missing):	N
Test	genotypes	(-genotype):	N
Condition	on	genotype	effects	(-condgenotype):	N
Assume	no	prior	linkage	(-nolinkage):	N
Model	odds	ratio	in	parents	(-parentrisk):	N
Use	only	one	family	based	control	(-onefbc):	N
Chromosome	X	(-chrX):	N
Chromosome	Y	(-chrY):	N
Convergence	threshold	(-epsilon):	1e-08
Numerical	maximisation	(-neldermead):	D-F-P
Random	restarts	(-restarts):	0
Random	number	seed	(-randomseed):	1
Number	of	permutations	(-permutation):	0
Permutation	distribution	quantile	(-quantile):	5
OUTPUT	OPTIONS
Output	file	(-output):
Brief	output	(-brief):	N
Output	LD	statistics	(-LD):	N
Output	permutation	analyses	(-permoutput):	N
Haplotype	dump	file	(-dump):
Just	the	most	likely	haplotypes	(-mostlikely):	N
---------
ANALYSIS	OF	BINARY	TRAIT:	Disease
Exploratory	pass...done
Identifying	rare	haplotypes:	Alternative	likelihood...done	(104	evaluations)
Individual	tests:	Null	likelihood...done	(43	evaluations)
Null	likelihood...done	(43	evaluations)
Alternative	likelihood...done	(108	evaluations)
MARKER	OPTIONS
Test	marker:	1
TEST	OF	OVERALL	ASSOCIATION
Null	log-likelihood	=	-333.1
Alternative	log-likelihood	=	-321.8
Likelihood	ratio	chisq	=	22.6	df	=	17	p-value	=	0.1627
ESTIMATES	OF	ALLELE	EFFECTS
Reference	allele:	101
Allele	Case	Control	Ca-Freq	Co-Freq	Odds-R	95%Lo	95%Hi	Chisq	P-value
101	6	26	0.1111	0.2131	1	1	1	2.618	0.1057
201	18	30	0.3333	0.2459	2.6	0.8983	7.525	1.443	0.2297
205	0	2	0	0.01639	0	0	0	0.8954	0.344
301	9	23	0.1667	0.1885	1.696	0.5234	5.494	0.1202	0.7288
1101	3	9	0.05556	0.07377	1.444	0.2976	7.01	0.1955	0.6584
2301	0	2	0	0.01639	0	0	0	0.8954	0.344
2402	6	7	0.1111	0.05738	3.714	0.9104	15.15	1.58	0.2088
2403	1	0	0.01852	0	2.915e+18	1.011e+18	8.402e+18	2.272	0.1317
2501	1	1	0.01852	0.008197	4.333	0.2359	79.59	0.355	0.5513
2601	1	2	0.01852	0.01639	2.167	0.1676	28.01	0.01009	0.92
2902	3	4	0.05556	0.03279	3.25	0.5702	18.52	0.5081	0.476
3001	0	1	0	0.008197	1.52e-08	1.52e-08	1.52e-08	0.4452	0.5046
3002	2	0	0.03704	0	4.456e+18	2.002e+18	9.918e+18	4.57	0.03253
3101	1	7	0.01852	0.05738	0.619	0.0636	6.026	1.303	0.2537
3201	2	5	0.03704	0.04098	1.733	0.2686	11.19	0.01527	0.9017
3301	0	2	0	0.01639	0	0	0	0.8954	0.344
6801	1	0	0.01852	0	2.915e+18	1.011e+18	8.402e+18	2.272	0.1317
6802	0	1	0	0.008197	1.52e-08	1.52e-08	1.52e-08	0.4452	0.5046
---------
Exploratory	pass...done
Identifying	rare	haplotypes:	Alternative	likelihood...done	(131	evaluations)
Individual	tests:	Null	likelihood...done	(56	evaluations)
Null	likelihood...done	(56	evaluations)
Alternative	likelihood...done	(131	evaluations)
MARKER	OPTIONS
Test	marker:	2
TEST	OF	OVERALL	ASSOCIATION
Null	log-likelihood	=	-452.5
Alternative	log-likelihood	=	-436
Likelihood	ratio	chisq	=	33.06	df	=	30	p-value	=	0.3198
ESTIMATES	OF	ALLELE	EFFECTS
Reference	allele:	702
Allele	Case	Control	Ca-Freq	Co-Freq	Odds-R	95%Lo	95%Hi	Chisq	P-value
702	6	22	0.1111	0.1803	1	1	1	1.341	0.2469
707	1	0	0.01852	0	4.293e+17	1.49e+17	1.237e+18	2.272	0.1317
801	7	13	0.1296	0.1066	1.974	0.5445	7.159	0.1978	0.6565
812	1	0	0.01852	0	4.293e+17	1.49e+17	1.237e+18	2.272	0.1317
1302	1	1	0.01852	0.008197	3.667	0.1987	67.66	0.355	0.5513
1401	2	2	0.03704	0.01639	3.667	0.4238	31.73	0.7182	0.3967
1402	1	4	0.01852	0.03279	0.9167	0.08569	9.806	0.2761	0.5993
1501	5	7	0.09259	0.05738	2.619	0.6082	11.28	0.7306	0.3927
1518	0	2	0	0.01639	0	0	0	0.8954	0.344
1801	3	4	0.05556	0.03279	2.75	0.4788	15.79	0.5081	0.476
2705	2	6	0.03704	0.04918	1.222	0.1946	7.676	0.1272	0.7213
3501	4	9	0.07407	0.07377	1.63	0.3695	7.187	5.036e-05	0.9943
3503	1	2	0.01852	0.01639	1.833	0.1411	23.83	0.01009	0.92
3801	1	0	0.01852	0	4.293e+17	1.49e+17	1.237e+18	2.272	0.1317
3901	0	2	0	0.01639	0	0	0	0.8954	0.344
3906	0	1	0	0.008197	0	0	0	0.4452	0.5046
4001	2	8	0.03704	0.06557	0.9167	0.1525	5.508	0.5688	0.4507
4002	0	1	0	0.008197	0	0	0	0.4452	0.5046
4101	0	1	0	0.008197	0	0	0	0.4452	0.5046
4102	0	1	0	0.008197	0	0	0	0.4452	0.5046
4402	6	13	0.1111	0.1066	1.692	0.4507	6.355	0.008059	0.9285
4403	3	4	0.05556	0.03279	2.75	0.4788	15.79	0.5081	0.476
4501	2	1	0.03704	0.008197	7.333	0.5643	95.3	1.858	0.1728
4901	0	1	0	0.008197	0	0	0	0.4452	0.5046
5101	2	8	0.03704	0.06557	0.9167	0.1525	5.508	0.5688	0.4507
5301	0	1	0	0.008197	0	0	0	0.4452	0.5046
5501	2	1	0.03704	0.008197	7.333	0.5643	95.3	1.858	0.1728
5601	0	1	0	0.008197	0	0	0	0.4452	0.5046
5701	0	6	0	0.04918	0	0	0	2.749	0.09729
15220	1	0	0.01852	0	4.293e+17	1.49e+17	1.237e+18	2.272	0.1317
44110	1	0	0.01852	0	4.293e+17	1.49e+17	1.237e+18	2.272	0.1317
---------
Exploratory	pass...done
Identifying	rare	haplotypes:	Alternative	likelihood...done	(113	evaluations)
Individual	tests:	Null	likelihood...done	(52	evaluations)
Null	likelihood...done	(52	evaluations)
Alternative	likelihood...done	(115	evaluations)
MARKER	OPTIONS
Test	marker:	3
TEST	OF	OVERALL	ASSOCIATION
Null	log-likelihood	=	-395.9
Alternative	log-likelihood	=	-389.3
Likelihood	ratio	chisq	=	13.24	df	=	18	p-value	=	0.7769
ESTIMATES	OF	ALLELE	EFFECTS
Reference	allele:	102
Allele	Case	Control	Ca-Freq	Co-Freq	Odds-R	95%Lo	95%Hi	Chisq	P-value
102	0	6	0	0.04918	1	1	1	2.749	0.09729
202	2	3	0.03704	0.02459	658700000	119300000	3638000000	0.2101	0.6467
303	6	5	0.1111	0.04098	1186000000	365700000	3844000000	3.142	0.07631
304	2	10	0.03704	0.08197	197600000	45570000	856800000	1.189	0.2755
401	6	13	0.1111	0.1066	456000000	169600000	1226000000	0.00806	0.9285
501	6	14	0.1111	0.1148	423400000	158900000	1128000000	0.004932	0.944
602	3	8	0.05556	0.06557	370500000	101200000	1357000000	0.06412	0.8001
701	8	15	0.1481	0.123	526900000	214600000	1294000000	0.2092	0.6474
702	9	23	0.1667	0.1885	386600000	169000000	884600000	0.1202	0.7288
704	1	2	0.01852	0.01639	494000000	51460000	4742000000	0.01009	0.92
802	3	5	0.05556	0.04098	592800000	147600000	2380000000	0.1832	0.6686
812	0	1	0	0.008197	6.973e-08	6.973e-08	6.973e-08	0.4452	0.5046
1127	0	1	0	0.008197	6.973e-08	6.973e-08	6.973e-08	0.4452	0.5046
1203	3	5	0.05556	0.04098	592800000	147600000	2380000000	0.1832	0.6686
1402	1	3	0.01852	0.02459	329300000	38870000	2791000000	0.06213	0.8032
1502	1	3	0.01852	0.02459	329300000	38870000	2791000000	0.06213	0.8032
1601	3	3	0.05556	0.02459	988000000	211800000	4608000000	1.09	0.2965
1604	0	1	0	0.008197	6.973e-08	6.973e-08	6.973e-08	0.4452	0.5046
1703	0	1	0	0.008197	6.973e-08	6.973e-08	6.973e-08	0.4452	0.5046
---------
Exploratory	pass...done
Identifying	rare	haplotypes:	Alternative	likelihood...done	(114	evaluations)
Individual	tests:	Null	likelihood...done	(57	evaluations)
Null	likelihood...done	(57	evaluations)
Alternative	likelihood...done	(114	evaluations)
MARKER	OPTIONS
Test	marker:	4
TEST	OF	OVERALL	ASSOCIATION
Null	log-likelihood	=	-93.39
Alternative	log-likelihood	=	-88.1
Likelihood	ratio	chisq	=	10.58	df	=	5	p-value	=	0.06038
ESTIMATES	OF	ALLELE	EFFECTS
Reference	allele:	103
Allele	Case	Control	Ca-Freq	Co-Freq	Odds-R	95%Lo	95%Hi	Chisq	P-value
103	39	105	0.7222	0.8607	1	1	1	4.822	0.0281
115	0	1	0	0.008197	2.686e-08	2.686e-08	2.686e-08	0.4452	0.5046
201	10	13	0.1852	0.1066	2.071	0.8398	5.107	2.037	0.1535
202	3	2	0.05556	0.01639	4.038	0.65	25.09	2.08	0.1493
206	2	0	0.03704	0	2.766e+94	1.359e+94	5.629e+94	4.571	0.03252
207	0	1	0	0.008197	2.686e-08	2.686e-08	2.686e-08	0.4452	0.5046
---------
Exploratory	pass...done
Identifying	rare	haplotypes:	Alternative	likelihood...done	(116	evaluations)
Individual	tests:	Null	likelihood...done	(44	evaluations)
Null	likelihood...done	(44	evaluations)
Alternative	likelihood...done	(111	evaluations)
MARKER	OPTIONS
Test	marker:	5
TEST	OF	OVERALL	ASSOCIATION
Null	log-likelihood	=	-309.7
Alternative	log-likelihood	=	-298.1
Likelihood	ratio	chisq	=	23.08	df	=	19	p-value	=	0.234
ESTIMATES	OF	ALLELE	EFFECTS
Reference	allele:	101
Allele	Case	Control	Ca-Freq	Co-Freq	Odds-R	95%Lo	95%Hi	Chisq	P-value
101	5	3	0.09259	0.02459	1	1	1	3.989	0.04578
201	4	14	0.07407	0.1148	0.1714	0.028	1.05	0.6747	0.4114
301	2	10	0.03704	0.08197	0.12	0.01489	0.9669	1.189	0.2755
401	21	60	0.3889	0.4918	0.21	0.04615	0.9556	1.596	0.2065
402	6	12	0.1111	0.09836	0.3	0.05293	1.7	0.06628	0.7968
501	3	2	0.05556	0.01639	0.9	0.09102	8.899	2.08	0.1493
601	2	5	0.03704	0.04098	0.24	0.02722	2.116	0.01527	0.9017
901	1	0	0.01852	0	75510000	25810000	220900000	2.272	0.1317
1001	2	2	0.03704	0.01639	0.6	0.05298	6.795	0.7182	0.3967
1101	3	4	0.05556	0.03279	0.45	0.05672	3.57	0.5081	0.476
1301	2	1	0.03704	0.008197	1.2	0.07335	19.63	1.858	0.1728
1401	0	1	0	0.008197	0	0	0	0.4452	0.5046
1701	0	1	0	0.008197	0	0	0	0.4452	0.5046
1901	0	1	0	0.008197	0	0	0	0.4452	0.5046
2001	0	2	0	0.01639	0	0	0	0.8954	0.344
2301	1	0	0.01852	0	75510000	25810000	220900000	2.272	0.1317
3501	0	1	0	0.008197	0	0	0	0.4452	0.5046
8101	0	1	0	0.008197	0	0	0	0.4452	0.5046
10401	1	2	0.01852	0.01639	0.3	0.01834	4.908	0.01009	0.92
41601	1	0	0.01852	0	75510000	25810000	220900000	2.272	0.1317
---------
Exploratory	pass...done
Identifying	rare	haplotypes:	Alternative	likelihood...done	(99	evaluations)
Individual	tests:	Null	likelihood...done	(44	evaluations)
Null	likelihood...done	(44	evaluations)
Alternative	likelihood...done	(104	evaluations)
MARKER	OPTIONS
Test	marker:	6
TEST	OF	OVERALL	ASSOCIATION
Null	log-likelihood	=	-320.8
Alternative	log-likelihood	=	-308.7
Likelihood	ratio	chisq	=	24.06	df	=	11	p-value	=	0.01248
ESTIMATES	OF	ALLELE	EFFECTS
Reference	allele:	101
Allele	Case	Control	Ca-Freq	Co-Freq	Odds-R	95%Lo	95%Hi	Chisq	P-value
101	3	21	0.05556	0.1721	1	1	1	4.319	0.03768
102	10	32	0.1852	0.2623	2.187	0.538	8.895	1.225	0.2684
103	2	5	0.03704	0.04098	2.8	0.3649	21.49	0.01527	0.9017
104	0	1	0	0.008197	4.531e-08	4.531e-08	4.531e-08	0.4452	0.5046
201	11	10	0.2037	0.08197	7.7	1.749	33.9	5.279	0.02158
301	3	10	0.05556	0.08197	2.1	0.3582	12.31	0.3817	0.5367
302	0	1	0	0.008197	4.531e-08	4.531e-08	4.531e-08	0.4452	0.5046
303	5	15	0.09259	0.123	2.333	0.4819	11.3	0.3425	0.5584
401	0	5	0	0.04098	0	0	0	2.278	0.1312
404	1	0	0.01852	0	2.922e+20	9.424e+19	9.06e+20	2.272	0.1317
501	9	15	0.1667	0.123	4.2	0.9705	18.18	0.6074	0.4358
505	10	7	0.1852	0.05738	10	2.127	47.02	7.007	0.008119
---------
Exploratory	pass...done
Identifying	rare	haplotypes:	Alternative	likelihood...done	(106	evaluations)
Individual	tests:	Null	likelihood...done	(46	evaluations)
Null	likelihood...done	(46	evaluations)
Alternative	likelihood...done	(106	evaluations)
MARKER	OPTIONS
Test	marker:	7
TEST	OF	OVERALL	ASSOCIATION
Null	log-likelihood	=	-333.8
Alternative	log-likelihood	=	-321.4
Likelihood	ratio	chisq	=	24.83	df	=	12	p-value	=	0.01565
ESTIMATES	OF	ALLELE	EFFECTS
Reference	allele:	201
Allele	Case	Control	Ca-Freq	Co-Freq	Odds-R	95%Lo	95%Hi	Chisq	P-value
201	9	15	0.1667	0.123	1	1	1	0.6074	0.4358
202	11	6	0.2037	0.04918	3.056	0.8384	11.14	10.24	0.001372
301	15	19	0.2778	0.1557	1.316	0.4521	3.829	3.577	0.05859
302	3	13	0.05556	0.1066	0.3846	0.08556	1.729	1.178	0.2777
303	0	5	0	0.04098	0	0	0	2.278	0.1312
402	1	5	0.01852	0.04098	0.3333	0.0334	3.327	0.5737	0.4488
501	3	21	0.05556	0.1721	0.2381	0.05502	1.03	4.319	0.03768
502	0	1	0	0.008197	0	0	0	0.4452	0.5046
503	0	1	0	0.008197	0	0	0	0.4452	0.5046
602	9	23	0.1667	0.1885	0.6522	0.2107	2.019	0.1202	0.7288
603	2	6	0.03704	0.04918	0.5556	0.09173	3.365	0.1272	0.7213
604	1	6	0.01852	0.04918	0.2778	0.02862	2.696	0.9215	0.3371
609	0	1	0	0.008197	0	0	0	0.4452	0.5046
---------
Exploratory	pass...done
Identifying	rare	haplotypes:	Alternative	likelihood...done	(117	evaluations)
Individual	tests:	Null	likelihood...done	(52	evaluations)
Null	likelihood...done	(52	evaluations)
Alternative	likelihood...done	(119	evaluations)
MARKER	OPTIONS
Test	marker:	8
TEST	OF	OVERALL	ASSOCIATION
Null	log-likelihood	=	-388.2
Alternative	log-likelihood	=	-372.9
Likelihood	ratio	chisq	=	30.54	df	=	20	p-value	=	0.06155
ESTIMATES	OF	ALLELE	EFFECTS
Reference	allele:	101
Allele	Case	Control	Ca-Freq	Co-Freq	Odds-R	95%Lo	95%Hi	Chisq	P-value
101	3	14	0.05556	0.1148	1	1	1	1.503	0.2202
102	0	4	0	0.03279	0	0	0	1.812	0.1783
103	0	5	0	0.04098	0	0	0	2.278	0.1312
301	9	15	0.1667	0.123	2.8	0.6273	12.5	0.6074	0.4358
401	6	16	0.1111	0.1311	1.75	0.3675	8.332	0.1374	0.7109
404	2	7	0.03704	0.05738	1.333	0.1793	9.913	0.3192	0.5721
405	0	1	0	0.008197	0	0	0	0.4452	0.5046
408	0	1	0	0.008197	0	0	0	0.4452	0.5046
701	11	10	0.2037	0.08197	5.133	1.131	23.3	5.279	0.02158
801	1	5	0.01852	0.04098	0.9333	0.07793	11.18	0.5737	0.4488
901	0	1	0	0.008197	0	0	0	0.4452	0.5046
1101	5	2	0.09259	0.01639	11.67	1.487	91.55	5.691	0.01705
1102	1	0	0.01852	0	1.286e+17	4.147e+16	3.987e+17	2.272	0.1317
1103	1	0	0.01852	0	1.286e+17	4.147e+16	3.987e+17	2.272	0.1317
1104	2	1	0.03704	0.008197	9.333	0.6241	139.6	1.858	0.1728
1201	1	2	0.01852	0.01639	2.333	0.156	34.9	0.01009	0.92
1301	2	5	0.03704	0.04098	1.867	0.2379	14.65	0.01527	0.9017
1302	1	7	0.01852	0.05738	0.6667	0.05821	7.636	1.303	0.2537
1454	0	1	0	0.008197	0	0	0	0.4452	0.5046
1501	9	24	0.1667	0.1967	1.75	0.405	7.562	0.2219	0.6376
1601	0	1	0	0.008197	0	0	0	0.4452	0.5046
---------
Exploratory	pass...done
Identifying	rare	haplotypes:	Alternative	likelihood...done	(18	evaluations)
Individual	tests:	Null	likelihood...done	(13	evaluations)
Null	likelihood...done	(13	evaluations)
Alternative	likelihood...done	(19	evaluations)
MARKER	OPTIONS
Test	marker:	9
TEST	OF	OVERALL	ASSOCIATION
Null	log-likelihood	=	-17.51
Alternative	log-likelihood	=	-17.46
Likelihood	ratio	chisq	=	0.1029	df	=	2	p-value	=	0.9499
ESTIMATES	OF	ALLELE	EFFECTS
Reference	allele:	101
Allele	Case	Control	Ca-Freq	Co-Freq	Odds-R	95%Lo	95%Hi	Chisq	P-value
101	2	5	0.3333	0.3571	1	1	1	0.01047	0.9185
202	3	6	0.5	0.4286	1.25	0.146	10.7	0.08658	0.7686
301	1	3	0.1667	0.2143	0.8333	0.05094	13.63	0.05952	0.8072
---------
Exploratory	pass...done
Identifying	rare	haplotypes:	Alternative	likelihood...done	(66	evaluations)
Individual	tests:	Null	likelihood...done	(22	evaluations)
Null	likelihood...done	(22	evaluations)
Alternative	likelihood...done	(66	evaluations)
MARKER	OPTIONS
Test	marker:	10
TEST	OF	OVERALL	ASSOCIATION
Null	log-likelihood	=	-3.169
Alternative	log-likelihood	=	-2.909
Likelihood	ratio	chisq	=	0.5192	df	=	1	p-value	=	0.4712
ESTIMATES	OF	ALLELE	EFFECTS
Reference	allele:	101
Allele	Case	Control	Ca-Freq	Co-Freq	Odds-R	95%Lo	95%Hi	Chisq	P-value
101	0	1	0	0.07143	1	1	1	0.3025	0.5823
103	4	13	1	0.9286	49760000	49760000	49760000	0.3025	0.5823
---------
Exploratory	pass...done
Identifying	rare	haplotypes:	Alternative	likelihood...done	(1	evaluations)
Individual	tests:	Null	likelihood...done	(1	evaluations)
Null	likelihood...done	(1	evaluations)
Alternative	likelihood...done	(1	evaluations)
MARKER	OPTIONS
Test	marker:	11
TEST	OF	OVERALL	ASSOCIATION
Null	log-likelihood	=	0
Alternative	log-likelihood	=	0
Likelihood	ratio	chisq	=	0	df	=	0	p-value	=	1
ESTIMATES	OF	ALLELE	EFFECTS
Reference	allele:	101
Allele	Case	Control	Ca-Freq	Co-Freq	Odds-R	95%Lo	95%Hi	Chisq	P-value
101	0	2	-1.#IO	1	1	1	1	-1.#IO	1
---------
***END	OF	UNPHASED	3.0.13***

## Sheet: Sheet5
All patients who developed moderate/severe ALVAL (n=62) versus asymptomatic patients with hips in situ > 10 years (n=61)
***START	OF	UNPHASED	3.0.13***
ANALYSIS	OPTIONS
Number	of	nuclear	families:	0
Number	of	unrelated	subjects:	123
Rare	haplotype	maximum	frequency	(-rare):	0
Zero	haplotype	maximum	frequency	(-zero):	1e-08
Quantitative	trait	variance	(-variance):	1
Model	normal	distribution	(-normal):	N
Restrict	to	certain	haplotypes	(-certain):	N
Estimate	missing	genotypes	(-missing):	N
Test	genotypes	(-genotype):	N
Condition	on	genotype	effects	(-condgenotype):	N
Assume	no	prior	linkage	(-nolinkage):	N
Model	odds	ratio	in	parents	(-parentrisk):	N
Use	only	one	family	based	control	(-onefbc):	N
Chromosome	X	(-chrX):	N
Chromosome	Y	(-chrY):	N
Convergence	threshold	(-epsilon):	1e-08
Numerical	maximisation	(-neldermead):	D-F-P
Random	restarts	(-restarts):	0
Random	number	seed	(-randomseed):	1
Number	of	permutations	(-permutation):	0
Permutation	distribution	quantile	(-quantile):	5
OUTPUT	OPTIONS
Output	file	(-output):
Brief	output	(-brief):	N
Output	LD	statistics	(-LD):	N
Output	permutation	analyses	(-permoutput):	N
Haplotype	dump	file	(-dump):
Just	the	most	likely	haplotypes	(-mostlikely):	N
---------
ANALYSIS	OF	BINARY	TRAIT:	Disease
Exploratory	pass...done
Identifying	rare	haplotypes:	Alternative	likelihood...done	(120	evaluations)
Individual	tests:	Null	likelihood...done	(50	evaluations)
Null	likelihood...done	(50	evaluations)
Alternative	likelihood...done	(119	evaluations)
MARKER	OPTIONS
Test	marker:	1
TEST	OF	OVERALL	ASSOCIATION
Null	log-likelihood	=	-489.7
Alternative	log-likelihood	=	-478.9
Likelihood	ratio	chisq	=	21.74	df	=	17	p-value	=	0.1951
ESTIMATES	OF	ALLELE	EFFECTS
Reference	allele:	101
Allele	Case	Control	Ca-Freq	Co-Freq	Odds-R	95%Lo	95%Hi	Chisq	P-value
101	19	26	0.1532	0.2131	1	1	1	1.476	0.2244
201	32	30	0.2581	0.2459	1.46	0.6736	3.163	0.04826	0.8261
205	1	2	0.008065	0.01639	0.6842	0.05774	8.108	0.3541	0.5518
301	22	23	0.1774	0.1885	1.309	0.5698	3.007	0.05074	0.8218
1101	5	9	0.04032	0.07377	0.7602	0.2193	2.635	1.282	0.2576
2301	1	2	0.008065	0.01639	0.6842	0.05774	8.108	0.3541	0.5518
2402	9	7	0.07258	0.05738	1.759	0.5563	5.564	0.2338	0.6288
2403	1	0	0.008065	0	138400000	50630000	378200000	0.9879	0.3203
2501	3	1	0.02419	0.008197	4.105	0.3958	42.59	0.9838	0.3213
2601	2	2	0.01613	0.01639	1.368	0.1766	10.6	0.0002688	0.9869
2902	5	4	0.04032	0.03279	1.711	0.4046	7.232	0.09908	0.7529
3001	2	1	0.01613	0.008197	2.737	0.231	32.43	0.3212	0.5709
3002	4	0	0.03226	0	481700000	280900000	825800000	4.001	0.04549
3101	3	7	0.02419	0.05738	0.5865	0.134	2.567	1.736	0.1876
3201	6	5	0.04839	0.04098	1.642	0.436	6.185	0.07891	0.7788
3301	2	2	0.01613	0.01639	1.368	0.1766	10.6	0.0002688	0.9869
6801	6	0	0.04839	0	434800000	274800000	688000000	6.051	0.0139
6802	1	1	0.008065	0.008197	1.368	0.08041	23.29	0.0001333	0.9908
---------
Exploratory	pass...done
Identifying	rare	haplotypes:	Alternative	likelihood...done	(140	evaluations)
Individual	tests:	Null	likelihood...done	(63	evaluations)
Null	likelihood...done	(63	evaluations)
Alternative	likelihood...done	(140	evaluations)
MARKER	OPTIONS
Test	marker:	2
TEST	OF	OVERALL	ASSOCIATION
Null	log-likelihood	=	-646.4
Alternative	log-likelihood	=	-628.3
Likelihood	ratio	chisq	=	36.27	df	=	34	p-value	=	0.3634
ESTIMATES	OF	ALLELE	EFFECTS
Reference	allele:	702
Allele	Case	Control	Ca-Freq	Co-Freq	Odds-R	95%Lo	95%Hi	Chisq	P-value
702	13	22	0.1048	0.1803	1	1	1	2.872	0.09015
707	1	0	0.008065	0	60160000000000	21760000000000	166300000000000	0.9879	0.3203
801	16	13	0.129	0.1066	2.083	0.764	5.678	0.2987	0.5847
812	1	0	0.008065	0	60160000000000	21760000000000	166300000000000	0.9879	0.3203
1302	4	1	0.03226	0.008197	6.769	0.6813	67.26	1.788	0.1812
1401	3	2	0.02419	0.01639	2.538	0.3736	17.25	0.1879	0.6647
1402	3	4	0.02419	0.03279	1.269	0.2446	6.586	0.1643	0.6853
1501	8	7	0.06452	0.05738	1.934	0.5685	6.58	0.05474	0.815
1518	1	2	0.008065	0.01639	0.8462	0.06971	10.27	0.3541	0.5518
1801	7	4	0.05645	0.03279	2.962	0.7253	12.09	0.8062	0.3692
2705	6	6	0.04839	0.04918	1.692	0.4507	6.355	0.0008339	0.977
3501	7	9	0.05645	0.07377	1.316	0.3955	4.381	0.3033	0.5818
3503	1	2	0.008065	0.01639	0.8461	0.06969	10.27	0.3541	0.5518
3701	2	0	0.01613	0	153500000000000	72930000000000	323200000000000	1.984	0.159
3801	1	0	0.008065	0	60160000000000	21760000000000	166300000000000	0.9879	0.3203
3901	0	2	0	0.01639	0	0	0	2.049	0.1523
3906	1	1	0.008065	0.008197	1.692	0.09736	29.41	0.0001333	0.9908
4001	6	8	0.04839	0.06557	1.269	0.3596	4.48	0.3384	0.5607
4002	1	1	0.008065	0.008197	1.692	0.09736	29.41	0.0001333	0.9908
4101	0	1	0	0.008197	2.467e-08	2.467e-08	2.467e-08	1.021	0.3124
4102	0	1	0	0.008197	2.467e-08	2.467e-08	2.467e-08	1.021	0.3124
4402	15	13	0.121	0.1066	1.953	0.7106	5.366	0.1266	0.722
4403	8	4	0.06452	0.03279	3.385	0.8495	13.48	1.334	0.248
4501	2	1	0.01613	0.008197	3.385	0.2788	41.09	0.3212	0.5709
4701	1	0	0.008065	0	60160000000000	21760000000000	166300000000000	0.9879	0.3203
4901	0	1	0	0.008197	2.467e-08	2.467e-08	2.467e-08	1.021	0.3124
5001	2	0	0.01613	0	153500000000000	72930000000000	323200000000000	1.984	0.159
5002	1	0	0.008065	0	60160000000000	21760000000000	166300000000000	0.9879	0.3203
5101	5	8	0.04032	0.06557	1.058	0.2851	3.924	0.7834	0.3761
5301	0	1	0	0.008197	2.467e-08	2.467e-08	2.467e-08	1.021	0.3124
5501	3	1	0.02419	0.008197	5.077	0.4771	54.03	0.9838	0.3213
5601	1	1	0.008065	0.008197	1.692	0.09736	29.41	0.0001333	0.9908
5701	2	6	0.01613	0.04918	0.5641	0.09891	3.217	2.135	0.144
15220	1	0	0.008065	0	60160000000000	21760000000000	166300000000000	0.9879	0.3203
44110	1	0	0.008065	0	60160000000000	21760000000000	166300000000000	0.9879	0.3203
---------
Exploratory	pass...done
Identifying	rare	haplotypes:	Alternative	likelihood...done	(123	evaluations)
Individual	tests:	Null	likelihood...done	(58	evaluations)
Null	likelihood...done	(58	evaluations)
Alternative	likelihood...done	(129	evaluations)
MARKER	OPTIONS
Test	marker:	3
TEST	OF	OVERALL	ASSOCIATION
Null	log-likelihood	=	-555.9
Alternative	log-likelihood	=	-548.5
Likelihood	ratio	chisq	=	14.8	df	=	19	p-value	=	0.7352
ESTIMATES	OF	ALLELE	EFFECTS
Reference	allele:	102
Allele	Case	Control	Ca-Freq	Co-Freq	Odds-R	95%Lo	95%Hi	Chisq	P-value
102	3	6	0.02419	0.04918	1	1	1	1.089	0.2966
202	5	3	0.04032	0.02459	3.333	0.4546	24.44	0.4838	0.4867
303	8	5	0.06452	0.04098	3.2	0.5395	18.98	0.6804	0.4095
304	9	10	0.07258	0.08197	1.8	0.3447	9.399	0.07602	0.7828
401	9	13	0.07258	0.1066	1.385	0.2724	7.037	0.8718	0.3505
501	15	14	0.121	0.1148	2.143	0.4477	10.26	0.02283	0.8799
602	14	8	0.1129	0.06557	3.5	0.6819	17.97	1.692	0.1934
701	17	15	0.1371	0.123	2.267	0.481	10.68	0.1088	0.7416
702	18	23	0.1452	0.1885	1.565	0.3434	7.135	0.8326	0.3615
704	3	2	0.02419	0.01639	3	0.312	28.84	0.1879	0.6647
802	6	5	0.04839	0.04098	2.4	0.3871	14.88	0.07891	0.7788
812	0	1	0	0.008197	0	0	0	1.021	0.3124
1127	0	1	0	0.008197	0	0	0	1.021	0.3124
1203	6	5	0.04839	0.04098	2.4	0.3871	14.88	0.07891	0.7788
1402	1	3	0.008065	0.02459	0.6667	0.04692	9.472	1.05	0.3055
1502	3	3	0.02419	0.02459	2	0.2408	16.61	0.000407	0.9839
1601	6	3	0.04839	0.02459	4	0.5634	28.4	0.988	0.3202
1602	1	0	0.008065	0	5876000000000	1895000000000	18220000000000	0.9879	0.3203
1604	0	1	0	0.008197	0	0	0	1.021	0.3124
1703	0	1	0	0.008197	0	0	0	1.021	0.3124
---------
Exploratory	pass...done
Identifying	rare	haplotypes:	Alternative	likelihood...done	(111	evaluations)
Individual	tests:	Null	likelihood...done	(35	evaluations)
Null	likelihood...done	(35	evaluations)
Alternative	likelihood...done	(111	evaluations)
MARKER	OPTIONS
Test	marker:	4
TEST	OF	OVERALL	ASSOCIATION
Null	log-likelihood	=	-145.6
Alternative	log-likelihood	=	-139.2
Likelihood	ratio	chisq	=	12.82	df	=	7	p-value	=	0.07652
ESTIMATES	OF	ALLELE	EFFECTS
Reference	allele:	103
Allele	Case	Control	Ca-Freq	Co-Freq	Odds-R	95%Lo	95%Hi	Chisq	P-value
103	91	105	0.7339	0.8607	1	1	1	6.104	0.01349
104	1	0	0.008065	0	2261000000000	844200000000	6058000000000	0.9879	0.3203
105	2	0	0.01613	0	529200000	262700000	1066000000	1.984	0.159
115	0	1	0	0.008197	1.837e-08	1.837e-08	1.837e-08	1.021	0.3124
201	24	13	0.1935	0.1066	2.13	1.026	4.425	3.642	0.05635
202	3	2	0.02419	0.01639	1.731	0.2829	10.59	0.1879	0.6647
206	2	0	0.01613	0	529300000	262700000	1066000000	1.984	0.159
207	1	1	0.008065	0.008197	1.154	0.07115	18.71	0.0001333	0.9908
---------
Exploratory	pass...done
Identifying	rare	haplotypes:	Alternative	likelihood...done	(124	evaluations)
Individual	tests:	Null	likelihood...done	(47	evaluations)
Null	likelihood...done	(47	evaluations)
Alternative	likelihood...done	(125	evaluations)
MARKER	OPTIONS
Test	marker:	5
TEST	OF	OVERALL	ASSOCIATION
Null	log-likelihood	=	-440
Alternative	log-likelihood	=	-428.4
Likelihood	ratio	chisq	=	23.22	df	=	20	p-value	=	0.2782
ESTIMATES	OF	ALLELE	EFFECTS
Reference	allele:	101
Allele	Case	Control	Ca-Freq	Co-Freq	Odds-R	95%Lo	95%Hi	Chisq	P-value
101	10	3	0.08065	0.02459	1	1	1	3.86	0.04944
201	10	14	0.08065	0.1148	0.2143	0.04667	0.9839	0.8126	0.3673
301	9	10	0.07258	0.08197	0.27	0.05598	1.302	0.07602	0.7828
401	53	60	0.4274	0.4918	0.265	0.06924	1.014	1.026	0.311
402	10	12	0.08065	0.09836	0.25	0.05364	1.165	0.237	0.6264
501	3	2	0.02419	0.01639	0.45	0.04957	4.085	0.1879	0.6647
601	3	5	0.02419	0.04098	0.18	0.0262	1.236	0.551	0.4579
901	2	0	0.01613	0	55590000	26020000	118700000	1.984	0.159
1001	4	2	0.03226	0.01639	0.6	0.07115	5.06	0.6505	0.42
1101	6	4	0.04839	0.03279	0.45	0.07386	2.742	0.3838	0.5356
1301	2	1	0.01613	0.008197	0.6	0.03932	9.156	0.3212	0.5709
1401	2	1	0.01613	0.008197	0.6	0.03932	9.156	0.3212	0.5709
1601	2	0	0.01613	0	55590000	26020000	118800000	1.984	0.159
1701	1	1	0.008065	0.008197	0.3	0.0141	6.382	0.0001334	0.9908
1901	1	1	0.008065	0.008197	0.3	0.0141	6.382	0.0001334	0.9908
2001	0	2	0	0.01639	0	0	0	2.049	0.1523
2301	2	0	0.01613	0	55590000	26020000	118800000	1.984	0.159
3501	0	1	0	0.008197	0	0	0	1.021	0.3124
8101	0	1	0	0.008197	0	0	0	1.021	0.3124
10401	3	2	0.02419	0.01639	0.45	0.04957	4.085	0.1879	0.6647
41601	1	0	0.008065	0	7020000	2512000	19620000	0.9879	0.3203
---------
Exploratory	pass...done
Identifying	rare	haplotypes:	Alternative	likelihood...done	(110	evaluations)
Individual	tests:	Null	likelihood...done	(46	evaluations)
Null	likelihood...done	(46	evaluations)
Alternative	likelihood...done	(120	evaluations)
MARKER	OPTIONS
Test	marker:	6
TEST	OF	OVERALL	ASSOCIATION
Null	log-likelihood	=	-458.1
Alternative	log-likelihood	=	-445
Likelihood	ratio	chisq	=	26.31	df	=	12	p-value	=	0.009706
ESTIMATES	OF	ALLELE	EFFECTS
Reference	allele:	101
Allele	Case	Control	Ca-Freq	Co-Freq	Odds-R	95%Lo	95%Hi	Chisq	P-value
101	10	21	0.08065	0.1721	1	1	1	4.673	0.03063
102	23	32	0.1855	0.2623	1.509	0.599	3.803	2.09	0.1483
103	6	5	0.04839	0.04098	2.52	0.618	10.28	0.07891	0.7788
104	5	1	0.04032	0.008197	10.5	1.079	102.2	2.667	0.1024
105	1	0	0.008065	0	6.797e+19	2.432e+19	1.9e+20	0.9879	0.3203
201	24	10	0.1935	0.08197	5.04	1.756	14.46	6.428	0.01123
301	7	10	0.05645	0.08197	1.47	0.4319	5.003	0.6224	0.4302
302	0	1	0	0.008197	2.422e-08	2.422e-08	2.422e-08	1.021	0.3124
303	11	15	0.08871	0.123	1.54	0.5215	4.547	0.7628	0.3825
401	1	5	0.008065	0.04098	0.42	0.04316	4.087	2.801	0.09423
404	1	0	0.008065	0	6.797e+19	2.432e+19	1.9e+20	0.9879	0.3203
501	20	15	0.1613	0.123	2.8	1.022	7.669	0.7407	0.3894
505	15	7	0.121	0.05738	4.5	1.395	14.52	3.054	0.08055
---------
Exploratory	pass...done
Identifying	rare	haplotypes:	Alternative	likelihood...done	(121	evaluations)
Individual	tests:	Null	likelihood...done	(49	evaluations)
Null	likelihood...done	(49	evaluations)
Alternative	likelihood...done	(121	evaluations)
MARKER	OPTIONS
Test	marker:	7
TEST	OF	OVERALL	ASSOCIATION
Null	log-likelihood	=	-484.9
Alternative	log-likelihood	=	-469
Likelihood	ratio	chisq	=	31.79	df	=	14	p-value	=	0.004292
ESTIMATES	OF	ALLELE	EFFECTS
Reference	allele:	201
Allele	Case	Control	Ca-Freq	Co-Freq	Odds-R	95%Lo	95%Hi	Chisq	P-value
201	20	15	0.1613	0.123	1	1	1	0.7407	0.3894
202	21	6	0.1694	0.04918	2.625	0.85	8.106	9.089	0.002571
301	22	19	0.1774	0.1557	0.8684	0.3502	2.154	0.2081	0.6482
302	6	13	0.04839	0.1066	0.3462	0.1067	1.122	2.92	0.0875
303	3	5	0.02419	0.04098	0.45	0.09267	2.185	0.551	0.4579
305	1	0	0.008065	0	374400000000	137100000000	1022000000000	0.9879	0.3203
319	3	0	0.02419	0	2954000000000	1610000000000	5420000000000	2.988	0.08388
402	3	5	0.02419	0.04098	0.45	0.09267	2.185	0.551	0.4579
501	11	21	0.08871	0.1721	0.3929	0.146	1.057	3.782	0.05181
502	0	1	0	0.008197	2.033e-08	2.033e-08	2.033e-08	1.021	0.3124
503	5	1	0.04032	0.008197	3.75	0.3956	35.54	2.667	0.1024
602	22	23	0.1774	0.1885	0.7174	0.295	1.745	0.05074	0.8218
603	6	6	0.04839	0.04918	0.75	0.2014	2.793	0.000834	0.977
604	1	6	0.008065	0.04918	0.125	0.01357	1.151	3.76	0.05248
609	0	1	0	0.008197	2.033e-08	2.033e-08	2.033e-08	1.021	0.3124
---------
Exploratory	pass...done
Identifying	rare	haplotypes:	Alternative	likelihood...done	(130	evaluations)
Individual	tests:	Null	likelihood...done	(60	evaluations)
Null	likelihood...done	(60	evaluations)
Alternative	likelihood...done	(132	evaluations)
MARKER	OPTIONS
Test	marker:	8
TEST	OF	OVERALL	ASSOCIATION
Null	log-likelihood	=	-553.5
Alternative	log-likelihood	=	-528.2
Likelihood	ratio	chisq	=	50.47	df	=	24	p-value	=	0.001232
ESTIMATES	OF	ALLELE	EFFECTS
Reference	allele:	101
Allele	Case	Control	Ca-Freq	Co-Freq	Odds-R	95%Lo	95%Hi	Chisq	P-value
101	9	14	0.07258	0.1148	1	1	1	1.291	0.256
102	1	4	0.008065	0.03279	0.3889	0.03724	4.061	1.888	0.1695
103	0	5	0	0.04098	0	0	0	5.187	0.02275
301	20	15	0.1613	0.123	2.074	0.7099	6.06	0.7407	0.3894
401	12	16	0.09677	0.1311	1.167	0.3795	3.587	0.7204	0.396
403	1	0	0.008065	0	5967000000000	2124000000000	16760000000000	0.9879	0.3203
404	3	7	0.02419	0.05738	0.6667	0.1358	3.272	1.736	0.1876
405	0	1	0	0.008197	1.037e-08	1.037e-08	1.037e-08	1.021	0.3124
406	1	0	0.008065	0	5967000000000	2124000000000	16760000000000	0.9879	0.3203
407	1	0	0.008065	0	5967000000000	2124000000000	16760000000000	0.9879	0.3203
408	0	1	0	0.008197	1.037e-08	1.037e-08	1.037e-08	1.021	0.3124
701	24	10	0.1935	0.08197	3.733	1.223	11.4	6.428	0.01123
801	2	5	0.01613	0.04098	0.6222	0.09869	3.923	1.374	0.2411
901	0	1	0	0.008197	1.037e-08	1.037e-08	1.037e-08	1.021	0.3124
1001	1	0	0.008065	0	5967000000000	2124000000000	16760000000000	0.9879	0.3203
1101	6	2	0.04839	0.01639	4.667	0.7666	28.41	2.001	0.1572
1102	4	0	0.03226	0	50140000000000	27830000000000	90360000000000	4.001	0.04549
1103	2	0	0.01613	0	39840000000000	18520000000000	85720000000000	1.984	0.159
1104	2	1	0.01613	0.008197	3.111	0.2448	39.54	0.3212	0.5709
1201	1	2	0.008065	0.01639	0.7778	0.06119	9.885	0.3541	0.5518
1301	6	5	0.04839	0.04098	1.867	0.4368	7.978	0.07891	0.7788
1302	1	7	0.008065	0.05738	0.2222	0.02327	2.122	4.753	0.02925
1454	5	1	0.04032	0.008197	7.778	0.7762	77.94	2.667	0.1024
1501	22	24	0.1774	0.1967	1.426	0.5153	3.946	0.1507	0.6979
1601	0	1	0	0.008197	1.037e-08	1.037e-08	1.037e-08	1.021	0.3124
---------
Exploratory	pass...done
Identifying	rare	haplotypes:	Alternative	likelihood...done	(67	evaluations)
Individual	tests:	Null	likelihood...done	(20	evaluations)
Null	likelihood...done	(20	evaluations)
Alternative	likelihood...done	(66	evaluations)
MARKER	OPTIONS
Test	marker:	9
TEST	OF	OVERALL	ASSOCIATION
Null	log-likelihood	=	-29.59
Alternative	log-likelihood	=	-27.6
Likelihood	ratio	chisq	=	3.972	df	=	3	p-value	=	0.2645
ESTIMATES	OF	ALLELE	EFFECTS
Reference	allele:	101
Allele	Case	Control	Ca-Freq	Co-Freq	Odds-R	95%Lo	95%Hi	Chisq	P-value
101	5	5	0.3125	0.3571	1	1	1	0.06696	0.7958
103	2	0	0.125	0	247200000	108900000	561300000	1.875	0.1709
202	8	6	0.5	0.4286	1.333	0.2612	6.806	0.1531	0.6956
301	1	3	0.0625	0.2143	0.3333	0.02525	4.401	1.489	0.2224
---------
Exploratory	pass...done
Identifying	rare	haplotypes:	Alternative	likelihood...done	(76	evaluations)
Individual	tests:	Null	likelihood...done	(28	evaluations)
Null	likelihood...done	(28	evaluations)
Alternative	likelihood...done	(76	evaluations)
MARKER	OPTIONS
Test	marker:	10
TEST	OF	OVERALL	ASSOCIATION
Null	log-likelihood	=	-3.464
Alternative	log-likelihood	=	-2.909
Likelihood	ratio	chisq	=	1.109	df	=	1	p-value	=	0.2923
ESTIMATES	OF	ALLELE	EFFECTS
Reference	allele:	101
Allele	Case	Control	Ca-Freq	Co-Freq	Odds-R	95%Lo	95%Hi	Chisq	P-value
101	0	1	0	0.07143	1	1	1	0.7453	0.388
103	10	13	1	0.9286	108300000	108300000	108300000	0.7453	0.388
---------
Exploratory	pass...done
Identifying	rare	haplotypes:	Alternative	likelihood...done	(1	evaluations)
Individual	tests:	Null	likelihood...done	(1	evaluations)
Null	likelihood...done	(1	evaluations)
Alternative	likelihood...done	(1	evaluations)
MARKER	OPTIONS
Test	marker:	11
TEST	OF	OVERALL	ASSOCIATION
Null	log-likelihood	=	0
Alternative	log-likelihood	=	0
Likelihood	ratio	chisq	=	0	df	=	0	p-value	=	1
ESTIMATES	OF	ALLELE	EFFECTS
Reference	allele:	101
Allele	Case	Control	Ca-Freq	Co-Freq	Odds-R	95%Lo	95%Hi	Chisq	P-value
101	2	2	1	1	1	1	1	-1.#IO	1
---------
***END	OF	UNPHASED	3.0.13***
